# Supplementary material for: Fragment expansion with NUDELs – poised DNA-encoded libraries
Source: Royal Society of Chemistry journal article supplement (doi:10.1039/d3sc01171b), 2023-01-01
Supplement: d3sc01171b1.pdf [file d3sc01171b1.pdf]

## Supplementary information

### Fragment expansion with NUDELs - poised DNA-encoded libraries

Catherine L. A. Salvini,<sup>a</sup> Benoit Darlot,<sup>b</sup> Jack Davison,<sup>a</sup> Mathew P. Martin,<sup>c</sup> Sue Tudhope,<sup>c</sup> Shannon Turberville,<sup>c</sup> Akane Kawamura,<sup>b</sup> Martin E. M. Noble,<sup>c</sup> Stephen R. Wedge,<sup>c</sup> James Crawford,<sup>d</sup> Michael J. Waring<sup>a\*</sup>

<sup>a</sup> Cancer Research Horizons Newcastle Drug Discovery Group, Chemistry, School of Natural and Environmental Sciences, Bedson Building, Newcastle University, NE1 7RU, UK.

<sup>b</sup> Chemistry, School of Natural and Environmental Sciences, Bedson Building, Newcastle University, NE1 7RU, UK.

<sup>c</sup> Cancer Research Horizons Newcastle Drug Discovery Group, Paul O’Gorman Building, Newcastle University, NE2 2AH, UK.

<sup>d</sup> Genentech Inc. 1 DNA Way, South San Francisco, California, 94080, USA.

## Contents

|                                                     |   |
|-----------------------------------------------------|---|
| Contents .....                                      | 1 |
| Reagents and Equipment.....                         | 3 |
| A. Solvents and Reagents.....                       | 3 |
| B. Analysis and Equipment.....                      | 3 |
| C. Chromatography Techniques.....                   | 4 |
| D. DNA Headpiece Material .....                     | 5 |
| Chemistry Procedures On-DNA .....                   | 6 |
| A. On DNA Generic Procedures.....                   | 6 |
| A.I. Synthesis of PEG ds-14mer .....                | 6 |
| A.II. General Ethanol Precipitation Procedure ..... | 7 |
| A.III. Amide Coupling with DMT-MM in DMF.....       | 7 |
| A.IV. Fmoc Deprotection Conditions .....            | 7 |
| A.V. Suzuki Cross Coupling Conditions .....         | 8 |
| B. 2D Library Label Synthesis .....                 | 8 |

|                                                                |                                                                                                   |    |
|----------------------------------------------------------------|---------------------------------------------------------------------------------------------------|----|
| B.I.                                                           | Phosphorylation.....                                                                              | 9  |
| B.II.                                                          | Ligation .....                                                                                    | 10 |
| B.III.                                                         | PCR Amplification .....                                                                           | 10 |
| Selection Procedures.....                                      |                                                                                                   | 11 |
| C.                                                             | Selection Against BRD4.....                                                                       | 11 |
| C.I.                                                           | Control Selection with Positive Control .....                                                     | 11 |
| C.II.                                                          | BRD4 Selection with Library.....                                                                  | 12 |
| Synthesised Constructs and Chromatograms.....                  |                                                                                                   | 15 |
| D.                                                             | Chromatograms .....                                                                               | 15 |
| D.I.                                                           | Headpiece, 6 .....                                                                                | 15 |
| Example of Validation of Warhead Coupling Aryl Acid to 6 ..... |                                                                                                   | 15 |
| D.II.                                                          | 13 .....                                                                                          | 15 |
| D.III.                                                         | Isoxazole Aryl-1 HP, 13-SI .....                                                                  | 16 |
| 1x1 Exemplar Library Member .....                              |                                                                                                   | 16 |
| D.IV.                                                          | Fmoc-Valine-Headpiece 1B-SI.....                                                                  | 16 |
| D.V.                                                           | Valine-Headpiece 2B-SI.....                                                                       | 17 |
| D.VI.                                                          | 3-iodobenzoyl-Valine-Headpiece (3B-SI) .....                                                      | 17 |
| DNA Building Blocks and Codes .....                            |                                                                                                   | 18 |
| Selection data .....                                           |                                                                                                   | 21 |
| Off-DNA Synthesis .....                                        |                                                                                                   | 34 |
| F.I.                                                           | N-ethyl-4-((2,2,2-trifluoroacetamido)methyl)benzamide 16-SI .....                                 | 35 |
| F.II.                                                          | 4-(aminomethyl)-N-ethylbenzamide 16 .....                                                         | 35 |
| F.III.                                                         | 4-((2-(4-bromo-1H-pyrazol-1-yl)acetamido)methyl)-N-ethylbenzamide 17a.....                        | 36 |
| F.IV.                                                          | N-(4-(ethylcarbamoyl)benzyl)-3-iodobenzamide 17b.....                                             | 36 |
| F.V.                                                           | 4-((2-(4-(3,5-dimethylisoxazol-4-yl)-1H-pyrazol-1-yl)acetamido)methyl)-N-ethylbenzamide 18a ..... | 36 |
| F.VI.                                                          | 3-(3,5-dimethylisoxazol-4-yl)-N-(4-(ethylcarbamoyl)benzyl)benzamide 18b .....                     | 37 |
| F.VII.                                                         | ethyl (2-(4-bromo-1H-pyrazol-1-yl)acetyl)-L-alaninate 20a .....                                   | 37 |

|         |                                                                                                 |    |
|---------|-------------------------------------------------------------------------------------------------|----|
| F.VIII. | Ethyl (3-iodobenzoyl)alaninate 20b .....                                                        | 38 |
| F.IX.   | (S)-2-(2-(4-bromo-1H-pyrazol-1-yl)acetamido)-N-ethylpropanamide 21 .....                        | 38 |
| F.X.    | (S)-2-(2-(4-(3,5-dimethylisoxazol-4-yl)-1H-pyrazol-1-yl)acetamido)-N-ethylpropanamide 22 .....  | 38 |
| F.XI.   | ethyl (3-(3,5-dimethylisoxazol-4-yl)benzoyl)alaninate 23 .....                                  | 39 |
| F.XII.  | 3-(3,5-dimethylisoxazol-4-yl)-N-(1-(ethylamino)-1-oxopropan-2-yl)benzamide 24 .....             | 39 |
| F.XIII. | (S)-N-benzyl-2-(2-(4-bromo-1H-pyrazol-1-yl)acetamido)propanamide 21-SI .....                    | 39 |
| F.XIV.  | (S)-N-benzyl-2-(2-(4-(3,5-dimethylisoxazol-4-yl)-1H-pyrazol-1-yl)acetamido)propanamide 25 ..... | 40 |
|         | Structural Biology .....                                                                        | 40 |
|         | Protein purification .....                                                                      | 40 |
|         | Surface Plasmon Resonance (SPR) .....                                                           | 40 |
|         | Protein crystallography .....                                                                   | 41 |
|         | Western blotting experiments .....                                                              | 41 |

## Reagents and Equipment

### A. Solvents and Reagents

Chemicals were purchased from Fluorochem and Sigma-Aldrich (Merck); they were used without further purification unless otherwise indicated. Fmoc-NH-PEG<sub>4</sub>-CO<sub>2</sub>H linker was purchased from key organics. TPGS-750-M was purchased from Sigma-Aldrich (Merck). All water used with DNA substrates was nuclease-free water purchased from ThermoFisher. DNA was purchased from Sigma-Aldrich (Merck) or IDT either attached to solid support, or as single stranded product, used without further purification unless otherwise specified. Deuterated solvents for NMR spectroscopy were purchased from Sigma-Aldrich. Anhydrous solvents using SureSeal™ or Acroseal™ were purchased from either Sigma-Aldrich or Acros, respectively.

### B. Analysis and Equipment

FTIR spectra were measured using an Agilent Cary 630 FTIR as a neat sample. LC-MS analyses were conducted using a Waters Acquity UPLC system with PDA and ELSD. When a 2 min gradient was used, the sample was eluted on Acquity UPLC BEH C<sup>18</sup>, 1.7 μm, 2.1 x 50 mm, with a flow rate of 0.6 μL/min

using 5-95% 0.1% HCOOH in MeCN. HRMS analyses were conducted using an Agilent 6550 iFunnel QTOF LC-MS with an Agilent 1260 Infinity UPLC system. The sample was eluted on Acquity UPLC BEH C<sup>18</sup> (1.7  $\mu$ m, 2.1 x 50mm) with a flow rate of 0.7 mLmin<sup>-1</sup>, and run at a gradient of 1.2 min 5-95% 0.1% HCOOH in MeCN with 0.1% aq. HCOOH. Calculated exact masses were quoted from ChemDraw Professional 20.0. All final compounds are >95% purity by HPLC.

DNA mass spectra were measured on an Agilent 6550 QTOF in negative mode, using standard 3200 m/z maximum and 2 GHz extended dynamic range. Drying gas temperature was at 260 °C at 12 L min<sup>-1</sup>, sheath gas temperature was 400 °C at 12 L min<sup>-1</sup>, nebuliser at 45 psig, VCap voltage of 4000 V and nozzle voltage of 2000 V.

The LC was carried out on an Agilent 1260 Infinity 2 using either an Agilent Advancedbio oligonucleotides column, 2.1x150 mm or 2.1x100 mm using methods A and B, respectively. Method A: the gradient was run at 0.4 mL min<sup>-1</sup> from 10% MeOH to 40% MeOH over 8 mins against 800 mM HFIP:8 mM DIPEA buffer solution. A 3 min flush at 95% MeOH ended each run. Method B: the gradient was run at 0.8 mL min<sup>-1</sup> from 10% MeOH to 50% MeOH over 3 mins against 200 mM HFIP:15 mM DIPEA buffer solution. A 1 min flush at 95% MeOH ended each run. Analysis of data was carried out using Agilent Qualitative Analysis version 7.0.

DNA transformations including phosphorylations, ligations, and PCR amplifications carried out using a Techne Prime thermal cycler, 96 x 0.2ml thermal cycler. Precise conditions described below. qPCR analysis carried out using either a CFX Opus 96 Real-Time PCR system, or a CFX96 Touch Deep Well Real-Time PCR Detection System. Reagents purchased from ThermoFisher or Sigma Aldrich (Merck). Next generation sequencing (NGS) carried out by GENEWIZ (South Plainfield, NJ) to undergo their Amplicon-EZ service on an Illumina platform.

### **C. Chromatography Techniques**

Normal phase column chromatography purifications were carried out using Biotage SP4 and Isolera automated flash system with UV monitoring at 278 nm and collection at 254 nm. Grace Resolve pre-packed flash cartridges were used for normal phase separations.

Preparative HPLC purification was carried on an Agilent 1260 infinity system using a Phenomenex Clarity 5  $\mu$ M Oligo-RP column, 10x150 mm. The gradient was run at 5 mL/min from 10% MeOH to 90% MeOH over 22 mins against an 800 mM HFIP:8 mM TEA buffer solution. Fractions were analysed at 210 and 260 nm wavelengths.

## D. DNA Headpiece Material

DNA headpiece materials. Two types of DNA were used to construct the DNA headpiece **HP-01** were both purchased from Sigma-Aldrich (Merck) either attached to solid support, or as single stranded product. DNA headpiece modifiable strand (5'- /5Phos/GTCTTGCCGAATTC-3', Figure 22 this is purchased attached to a polymer support through the 3' hydroxyl group with an MMT protection of the modified 5' phosphate. DNA headpiece complementary strand, comp. strand, (5'- /5OH/CAGAACGGCTTA -3', Figure 3) was purified by HPLC as described above prior to use. DNA components are received as granular solids.

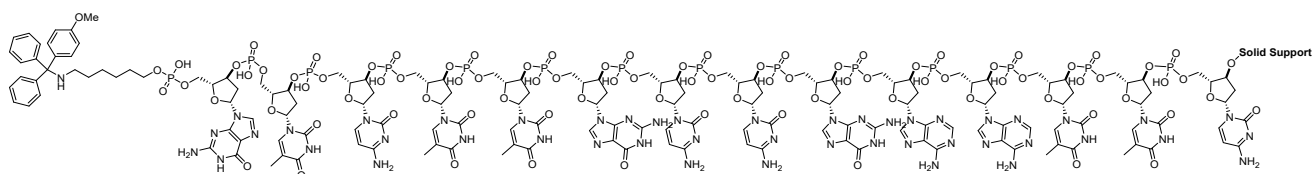

DNA headpiece as purchased modifiable strand with chemical spacer.

# Chemistry Procedures On-DNA

## A. On DNA Generic Procedures

### A.I. Synthesis of PEG ds-14mer

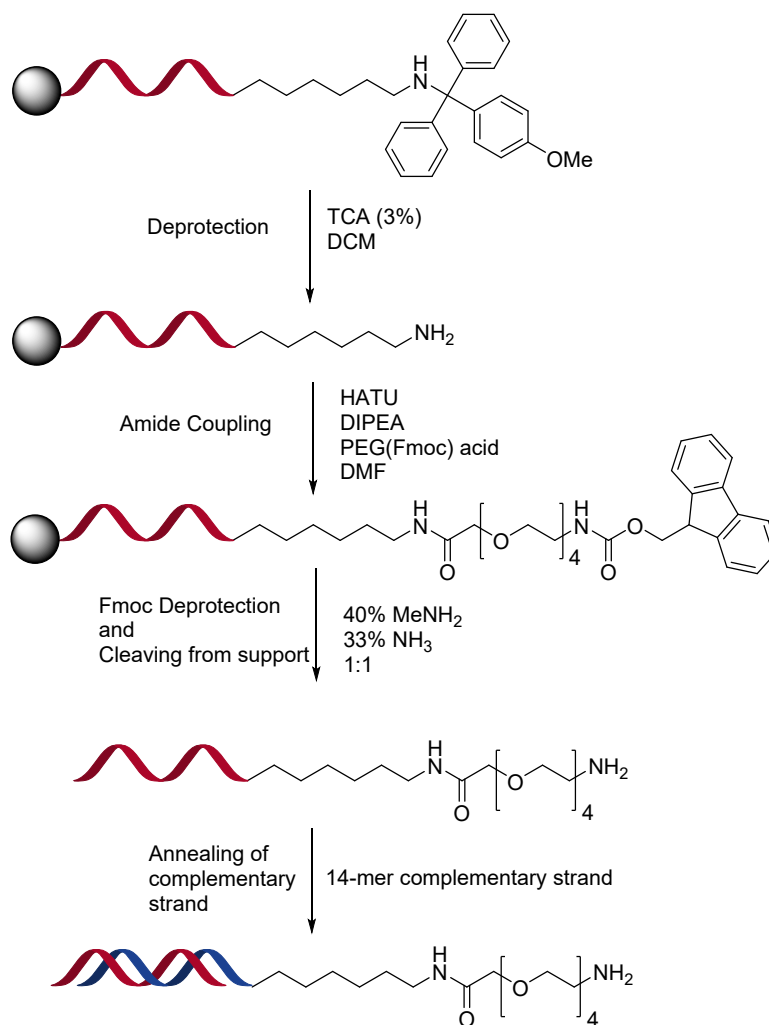

To cleave the MMT protecting group ps-ss-14mer(MMT) (100 mg, 2.0  $\mu$ mol) was washed with 3% TCA in DCM (15 mL), the filtrate was a strong yellow colour. This was continued until the filtrate ran colourless. The ps-DNA was then washed with DCM and allowed to air dry<sup>24</sup>.

An Eppendorf was charged with 1-(9H-fluoren-9-yl)-3-oxo-2,7,10,13,16-pentaoxa-4-azaocadecan-18-oic acid (19 mg, 40  $\mu$ mol), DMF (1.0 mL), DIPEA (17  $\mu$ L, 100  $\mu$ mol), and HATU (17 mg, 44  $\mu$ mol). The mixture was vortexed for 20 minutes before the dry ps-ss-14mer was added and the reaction was shaken for 16 hours at room temperature. The ps-DNA was washed with DMF (1500  $\mu$ L), MeCN (1500  $\mu$ L), MeOH (1500  $\mu$ L), and DCM (1500  $\mu$ L) and allowed to air dry before being suspended in a 1:1 mixture of NH<sub>3</sub> aq. (40%, 500  $\mu$ L) and MeNH<sub>2</sub> aq. (33%, 500  $\mu$ L). The suspension was then shaken for

16 hours at room temperature. The DNA product was collected by filtration and purified by HPLC. The gradient was run at 5 mL/min from 10% MeOH to 90% MeOH over 22 mins against an 800 mM HFIP:8 mM TEA buffer solution.

## A.II. General Ethanol Precipitation Procedure

Aqueous sodium chloride (10% volume, 4 M) added to aqueous DNA solution followed by cold absolute ethanol to give an 80% ethanol solution. The mixture was incubated at -78 °C for 1 hour. The mixture was then centrifuged, and the ethanol layer removed. Aqueous ethanol solution (70% v/v) was added, and the process repeated. The pellet of DNA then dissolved in water to give a 1 mM solution.<sup>48</sup>

## A.III. Amide Coupling with DMT-MM in DMF

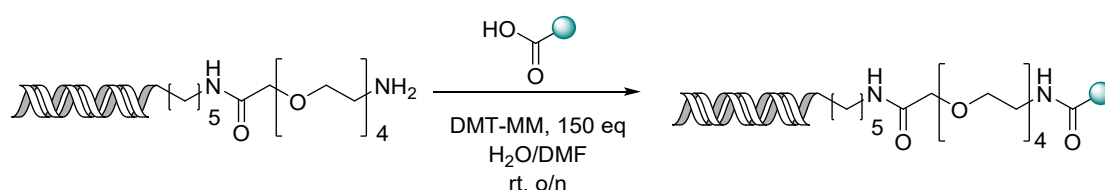

A solution of DNA **6** (1.0 mM) was pipetted into a PCR tube, to which was added pH 9.4 borate buffer (150 mM, 50  $\mu$ L), amino acid in DMF (150 mM, 12.6  $\mu$ L), and freshly prepared DMT-MM in water (250 mM, 7.6  $\mu$ L). Each well was vortexed for 10 seconds and left to shake for 6 hours. A second addition of DMT-MM solution (250 mM, 7.6  $\mu$ L) was carried out and the mixture allowed to shake for a further 16 hours at RT. The reaction was worked up by ethanol precipitation according to procedure A.II.<sup>6</sup>

## A.IV. Fmoc Deprotection Conditions

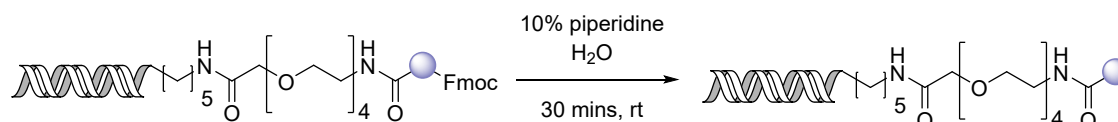

Fmoc-protected DNA-construct solution (1.0 mM) was added to an Eppendorf followed by piperidine to give a 10% aqueous solution (v/v). The mixture was incubated at room temperature for 1 hour. The reaction is worked up by ethanol precipitation according to procedure A.II.<sup>48</sup>

## A.V. Suzuki Cross Coupling Conditions

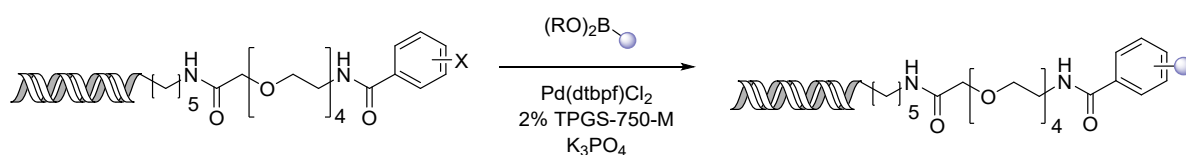

Boronic acid/ester solution (20  $\mu$ l, 0.75 M in DMF) was weighed into a 50  $\mu$ l glass insert for a para-dox 96-well micro-Para-dox™ photoredox/optimisation plate. To the insert was added; a solution of 5% TPGS-750-M in water (4.0  $\mu$ l), potassium phosphate (6.0  $\mu$ l of a solution of 113 mg in 200  $\mu$ l water) and the halogenated headpiece (20  $\mu$ l of 1 mM in 2% TPGS-750-M in water). The vials were subsequently vortexed for 30 seconds each.  $Pd(dtbpf)Cl_2$  (4.5  $\mu$ l of 6.37mg in 200  $\mu$ l THF) was added and the samples vortexed again for 10 seconds each. The mixtures were heated in a Para-dox™ 96-well micro photoredox/optimisation plate at 60 °C for 5 hours. QTOF mass spectrometry was used to analyse reactions. Samples prepared by diluting reaction mixture with water (300  $\mu$ l) DCM (300  $\mu$ l) was added to each vial and vortexed. The organics were removed, and aliquot taken for mass spec analysis. The reaction was worked up by ethanol precipitation according to procedure A.II.<sup>66</sup>

## B. 2D Library Label Synthesis

First Ligation

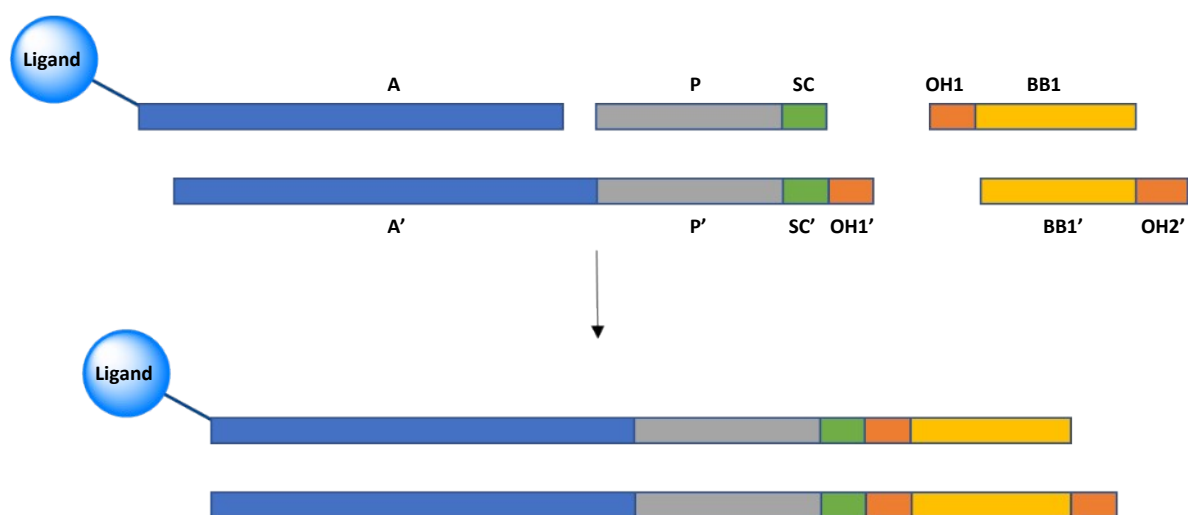



## Second Ligation

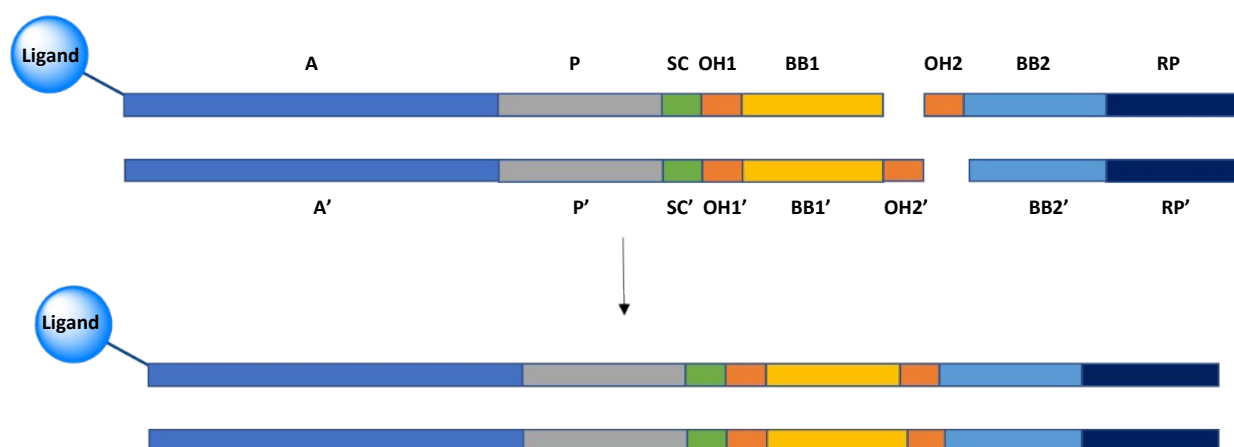

Experimental Table 4 - Codes, functions, and corresponding sequence for each DNA section

| Code        | Function                            | Sequences 5'-3'         |
|-------------|-------------------------------------|-------------------------|
| <b>A</b>    | Adapter – 5' aminolinked head piece | GTCTTGCCGAATTC          |
| <b>A'</b>   | Complimentary adapter               | GAATTCGGCAAGAC          |
| <b>P</b>    | Primer                              | AGGTCGGTGTGAACGGATTG    |
| <b>P'</b>   | Complementary primer                | CAAATCCGTTACACCGACCT    |
| <b>S</b>    | Scaffold code                       | CATGTAA                 |
| <b>S'</b>   | Complementary scaffold code         |                         |
| <b>OH1</b>  | Ligation overhang 1                 | GTAT                    |
| <b>OH1'</b> | Complementary OH1                   | ATAC                    |
| <b>BB1</b>  | Building block 1                    | xxxxxxxx                |
| <b>BB1'</b> | Complementary BB1                   | xxxxxxxx                |
| <b>OH2</b>  | Ligation overhang 2                 | CCTA                    |
| <b>OH2'</b> | Complementary OH2                   | TAGG                    |
| <b>BB2</b>  | Building block 2                    | xxxxxxxx                |
| <b>BB2'</b> | Complementary BB2                   | xxxxxxxx                |
| <b>P2</b>   | Complementary to P2'                | TGACCTCAACTACATGGTCTACA |
| <b>P2'</b>  | Primer (reverse)                    | TGTAGACCATGTAGTTGAGGTCA |

### B.I. Phosphorylation

Prior to ligation, the 5' terminus of each strand was phosphorylated in separate reactions. DNA strands (450  $\mu$ M, 9000 pmol in overall reaction media of 20  $\mu$ l) were added PNK reaction buffer (2  $\mu$ l, 500mM Tris-HCl [pH 7.6 at 25°C], 100mM MgCl<sub>2</sub>, 50 mM DTT, 1mM spermidine), ATP (2  $\mu$ l, 10 mM, Thermo Scientific), T4 Polynucleotide Kinase (1  $\mu$ l, 10U/ $\mu$ l, Thermo Scientific) and nuclease free water (up to 20  $\mu$ l). The reaction was carried out at 37 °C for 1 hour, followed by heating to 75 °C for 10 mins. DNA was used in the ligation steps without purification or precipitation.

## B.II. Ligation

Ligations contained DNA (100  $\mu$ M, 9000 pmol in overall reaction media of 90  $\mu$ l), phosphorylated DNA strands (20  $\mu$ l, 9000 pmol), 10X T4 DNA ligase buffer (9  $\mu$ l, 400 mM Tris-HCl, 100 mM MgCl<sub>2</sub>, 100 mM DTT, 5 mM ATP9), water (up to 90  $\mu$ l) and T4 DNA Ligase (3  $\mu$ l, 30 Weiss U/ $\mu$ L). The ligations were carried out at 25°C for 16 hours, followed by heating to 75°C for 10 mins. Each ligation was purified by ethanol precipitation prior to the subsequent organic reaction taking place.

## B.III. PCR Amplification

Forward and reverse primers were designed to amplify the DEL library, flanked by 5' Illumina adapter sequences to enable downstream sequence analysis and differentiation from target sequence. Each PCR was performed in a 50 $\mu$ l reaction mixture containing AmpliTaq Gold® 360 Master Mix (Thermo Fisher) and 200 ng of 1x1 prototype library (at 4.2  $\mu$ M). The final concentration of each primer used was 10  $\mu$ M. PCR amplification carried out using a Techne Prime thermal cycler, 96 x 0.2ml. The thermal cycling conditions were as follows: 10 min at 95 °C, followed by 40 cycles of 30 s at 95 °C, 30 s at 55°C, and 1 min at 72°C, with a final extension time of 420 s at 72°C. A negative control (distilled water in place of primers) was included in each run. Following the PCR reactions, the samples were run on a 4% Agarose E-gel.

Table 1 Forward and reverse primers for PCR. Primer sequence (blue) and NGS Illumina elongation sequence (purple).

| Primer                       | Sequence 5'-3'                                              | Length |
|------------------------------|-------------------------------------------------------------|--------|
| Long Forward primer<br>(LFP) | ACACTCTTTCCTACACGACGCTCTTCCGATCTTGTAG<br>ACCATGTAGTTGAGGTCA | 56     |
| Long Reverse primer<br>(LRP) | GACTGGAGTTCAGACGTGTGCTCTTCCGATCTAGGTC<br>GGTGTGAACGGATTTG   | 53     |

## Selection Procedures

### C. Selection Against BRD4

#### C.I. Control Selection with Positive Control

| Product                                                                                | Comments                                                                                    |
|----------------------------------------------------------------------------------------|---------------------------------------------------------------------------------------------|
| His6-BRD4                                                                              | 20uL aliquot (76uM)                                                                         |
| Dynabeads™ His-Tag Isolation and Pulldown                                              | /                                                                                           |
| Buffer*                                                                                | HEPES 40 mM, NaCl 300 mM, 0.1 mg/mL BSA, 0.1 mg/mL Salmon Sperm DNA, 0.05% TWEEN20 (pH 7.8) |
| SYBR™ Green PCR Master Mix                                                             | /                                                                                           |
| Hard-Shell® Low-Profile, Thin-Wall, Skirted 96-Well PCR Plates, White Shell/White Well | /                                                                                           |
| Microseal 'B' PCR Plate Sealing Film, adhesive, optical                                | /                                                                                           |
| Protein LoBind Tubes, Protein LoBind®, 0.5 mL, PCR clean, colorless, 1 bag × 500 tubes | /                                                                                           |

|                     |                                         |
|---------------------|-----------------------------------------|
| Forward Primer (FW) | <a href="#">AGGTCGGTGTGAACGGATTTG</a>   |
| Reverse Primer (RV) | <a href="#">TGTAGACCATGTAGTTGAGGTCA</a> |

|                                               |                                                                                                                               |
|-----------------------------------------------|-------------------------------------------------------------------------------------------------------------------------------|
| JQ1-DNA<br>(JQ1 attached to 5' written 5'→3') | <a href="#">GTCTTGCCGAATTCAGGTCGGTGTGAACGGATTTGCATGTAAGT</a><br><a href="#">ATACTGGCTACCTGGCGTACATTGACCTCAACTACATGGTCTACA</a> |
|-----------------------------------------------|-------------------------------------------------------------------------------------------------------------------------------|

An appropriate amount of His Trap Dynabead was washed 3 times with 100 µL of buffer and then re-suspended in the original amount of slurry. After a bead loading experiment, it was found that the loading capacity of the His-trap Dynabeads was 16 pmol BRD4/uL of slurry. Positive beads (POS): 20 pmol of BRD4 was incubated with 1.25 µL of washed Dynabead slurry and then buffer was added up to 20 µL in Low binding tube. Negative beads 1 (NEG1): 20 pmol of BRD4 was incubated with 1.25 µL of washed Dynabead slurry and then buffer was added up to 20 µL in Low binding tube. Negative beads 2 (NEG2): 1.25 µL of washed Dynabead slurry was diluted with buffer up to 20 µL in Low binding tube. POS, NEG1 and NEG2 were incubated at 4°C for 30 min on a rotating wheel. POS, NEG1 and

NEG2 were then washed 3 times with 100  $\mu$ L buffer and finally left dry. POS: 2  $\mu$ Mol of JQ1-DNA in 20  $\mu$ L of buffer was added to the beads and left to incubate at 25°C for 1h. NEG1: 2  $\mu$ Mol of DNA (without JQ1) in 20  $\mu$ L of buffer was added to the beads and left to incubate at 25°C for 1h. NEG2: 2  $\mu$ Mol of JQ1-DNA in 20  $\mu$ L of buffer was added to the beads and left to incubate at 25°C for 1h. This need to be quick, but precise to avoid losing binding molecules in the washes. Each sample supernatant is then removed, and beads are quickly resuspended in 20  $\mu$ L ice cold buffer and then transferred in a fresh low binding tube. This step is repeated twice more. The resulting beads are then suspended in 20  $\mu$ L of fresh buffer. All beads are then heated at 95°C for 5min. The supernatant is then immediately removed and stored in a new fresh low binding tube.

| qPCR mix                                 | Volume ( $\mu$ L) |
|------------------------------------------|-------------------|
| <b>SYBR Green (2X)</b>                   | 330               |
| <b>FW primer (100 <math>\mu</math>M)</b> | 1.65              |
| <b>RV primer (100 <math>\mu</math>M)</b> | 1.65              |
| <b>H<sub>2</sub>O</b>                    | 293.7             |
| <b>Total for 10 reactions</b>            | 627               |

qPCR was set up as follows with 1 $\mu$ L of sample mixed with 19 $\mu$ L of qPCR mix.

|          | 1                    | 2                   | 3                   | 4                   | 5                | 6     | 7   | 8    | 9    |
|----------|----------------------|---------------------|---------------------|---------------------|------------------|-------|-----|------|------|
| <b>A</b> | std 10 <sup>10</sup> | std 10 <sup>8</sup> | std 10 <sup>6</sup> | std 10 <sup>4</sup> | H <sub>2</sub> O | input | POS | NEG1 | NEG2 |
| <b>B</b> | std 10 <sup>10</sup> | std 10 <sup>8</sup> | std 10 <sup>6</sup> | std 10 <sup>4</sup> | H <sub>2</sub> O | input | POS | NEG1 | NEG2 |
| <b>C</b> | std 10 <sup>10</sup> | std 10 <sup>8</sup> | std 10 <sup>6</sup> | std 10 <sup>4</sup> | H <sub>2</sub> O | input | POS | NEG1 | NEG2 |

qPCR program: 95°C for 3min, (95°C for 40s, 61°C for 40s, 72°C for 40s, imaging)\*40. Results were analysed using the CFX manager software and label

## C.II. BRD4 Selection with Library

| Product                                                   | Comments                                                                                    |
|-----------------------------------------------------------|---------------------------------------------------------------------------------------------|
| <b>His6-BRD4</b>                                          | 20 $\mu$ L aliquot (76 $\mu$ M)                                                             |
| <a href="#">Dynabeads™ His-Tag Isolation and Pulldown</a> | /                                                                                           |
| <b>Buffer</b>                                             | HEPES 40 mM, NaCl 300 mM, 0.1 mg/mL BSA, 0.1 mg/mL Salmon Sperm DNA, 0.05% TWEEN20 (pH 7.8) |
| <b>SYBR™ Green PCR Master Mix</b>                         | /                                                                                           |

|                                                                                                               |   |
|---------------------------------------------------------------------------------------------------------------|---|
| <a href="#"><u>Hard-Shell® Low-Profile, Thin-Wall, Skirted 96-Well PCR Plates, White Shell/White Well</u></a> | / |
| <b>Microseal 'B' PCR Plate Sealing Film, adhesive, optical</b>                                                | / |
| <b>Protein LoBind Tubes, Protein LoBind®, 0.5 mL, PCR clean, colorless, 1 bag × 500 tubes</b>                 | / |

|                            |                         |
|----------------------------|-------------------------|
| <b>Forward Primer (FW)</b> | AGGTCGGTGTGAACGGATTG    |
| <b>Reverse Primer (RV)</b> | TGTAGACCATGTAGTTGAGGTCA |

|                                     |                                                                                               |
|-------------------------------------|-----------------------------------------------------------------------------------------------|
| <b>JQ1-DNA (JQ1 attached to 5')</b> | GTCTTGCCGAATTCAGGTCGGTGTGAACGGATTTGCATGTAAGT<br>ATACTGGCTACCTGGCGTACATTGACCTCAACTACATGGTCTACA |
|-------------------------------------|-----------------------------------------------------------------------------------------------|

An appropriate amount of His Trap Dynabead was washed 3 times with 100 µL of buffer and then re-suspended in the original amount of slurry. After a bead loading experiment it was found that the loading capacity of the His-trap Dynabeads was **16 pmol BRD4/µL of slurry**. Positive beads (POS\_JQ1\_sl): 20 pmol of BRD4 was incubated with 1.25 µL of washed Dynabead slurry and then buffer was added up to 20 µL in Low binding tube. Negative beads (NEG\_JQ1\_sl): 1.25 µL of washed Dynabead slurry was diluted with buffer up to 20 µL in Low binding tube. Positive beads (POS\_csDEL\_1): 20 pmol of BRD4 was incubated with 1.25 µL of washed Dynabead slurry and then buffer was added up to 20 µL in Low binding tube. Negative beads (NEG\_csDEL\_1): 1.25 µL of washed Dynabead slurry was diluted with buffer up to 20 µL in Low binding tube. POS and NEG were incubated at 4°C for 30 min on a rotating wheel. POS and NEG were then washed 3 times with 100 µL buffer and finally left dry. POS\_JQ1\_sl: 2 nmol of JQ1\_sl-DNA in 20 µL of buffer was added to the beads and left to incubate at 25°C for 1h. NEG\_JQ1\_sl: 2 nmol of JQ1\_sl-DNA in 20 µL of buffer was added to the beads and left to incubate at 25°C for 1h. POS\_csDEL\_1: 2 nmol of csDEL-DNA in 20 µL of buffer was added to the beads and left to incubate at 25°C for 1H (containing 0.052nmol of JQ1-DNA (PEG linker) same quantity as each of the 42 members of this library). NEG\_csDEL\_1: 2 nmol of JQ1\_sl-DNA in 20 µL of buffer was added to the beads and left to incubate at 25°C for **30 min** (containing 0.052nmol of JQ1-DNA (PEG linker) same quantity as each of the 42 members of this library). POS\_csDEL\_1: supernatant from NEG\_csDEL\_1 was transferred on POS\_csDEL\_1 beads and further incubated at 25°C for

1h. **IMPORTANT STEP: (need to be quick, but precise to avoid losing binding molecules in the washes).** Each sample supernatant is then removed, and beads are **quickly** resuspended in 20  $\mu$ L ice cold buffer and then transferred in a fresh low binding tube. This step is repeated twice more. The resulting beads are then suspended in 20  $\mu$ L of fresh buffer. All beads are then heated at 95°C for 5min. The supernatant is then immediately removed and stored in a new fresh low binding tube.

| qPCR mix                                 | Volume ( $\mu$ L) |
|------------------------------------------|-------------------|
| <b>SYBR Green (2X)</b>                   | 330               |
| <b>FW primer (100 <math>\mu</math>M)</b> | 1.65              |
| <b>RV primer (100 <math>\mu</math>M)</b> | 1.65              |
| <b>H<sub>2</sub>O</b>                    | 293.7             |
| <b>Total for 10 reactions</b>            | 627               |

qPCR was set up as follows with 1 $\mu$ L of sample mixed with 19 $\mu$ L of qPCR mix.

qPCR program: 95°C for 3min, (95°C for 40s, 61°C for 40s, 72°C for 40s, imaging)\*40. Results were analysed using the CFX manager software and label

# Synthesised Constructs and Chromatograms

## D. Chromatograms

### D.I. Headpiece, 6

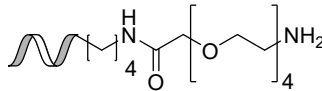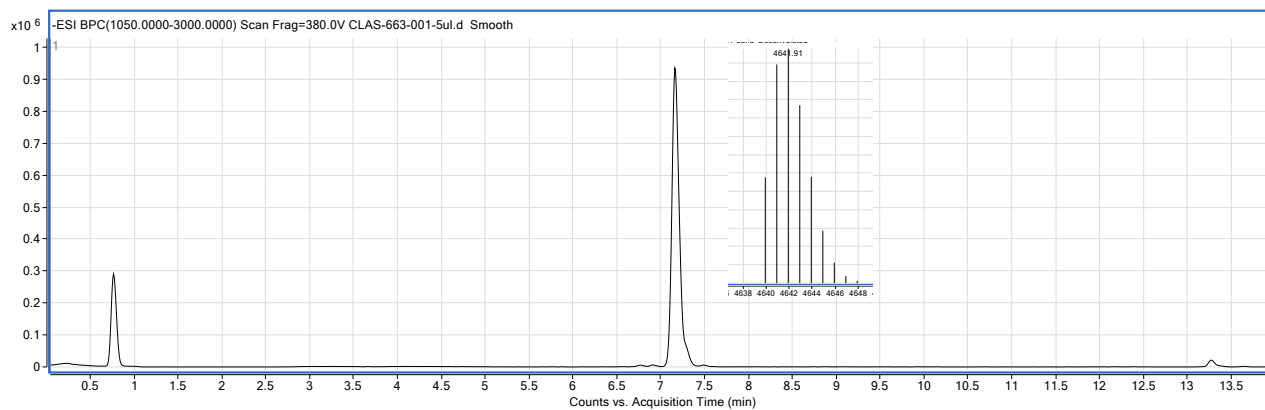

Mass calculated: 4639.93

Mass recorded: 4639.91

**6** was synthesised according to procedure A.I (Synthesis of PEG ds-14mer aka. Headpiece-01) and analysed by mass spectrometry.

## Example of Validation of Warhead Coupling Aryl Acid to 6

### D.II. 13

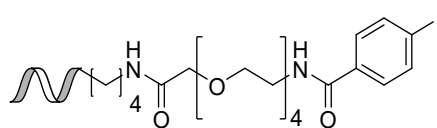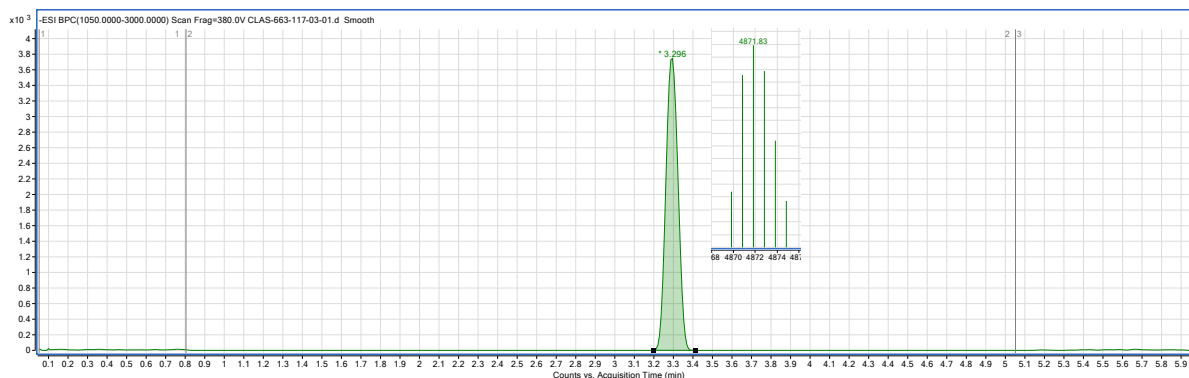

Mass calculated: 4869.85

Mass recorded: 4869.83

Conversion: 100%.

Synthesised from **6** according to procedure E.III.i. and analysed by mass spectrometry.

### D.III. Isoxazole Aryl-1 HP, 13-SI

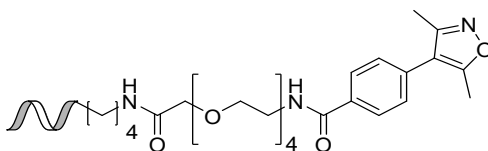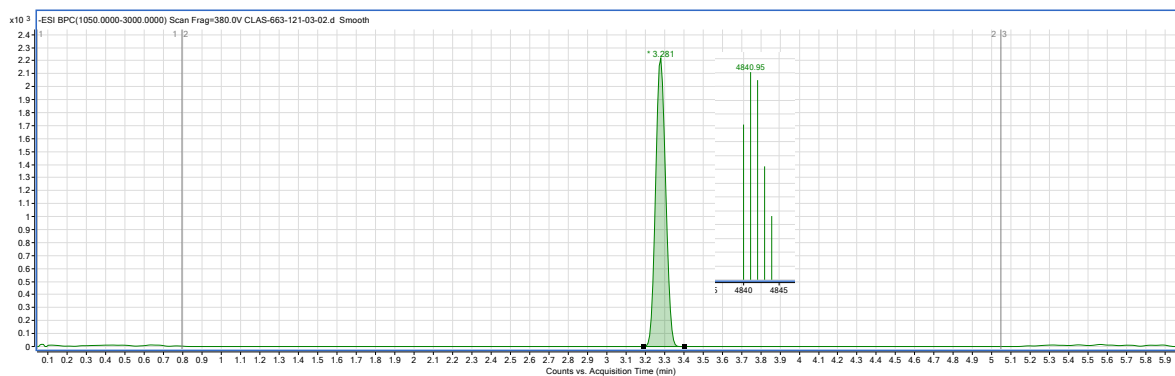

Mass calculated: 4838.99

Mass found: 4839.94

Conversion: 100%.

Synthesised from **13** according to procedure E.V and analysed by mass spectrometry.

1x1 Exemplar Library Member

### D.IV. Fmoc-Valine-Headpiece 1B-SI

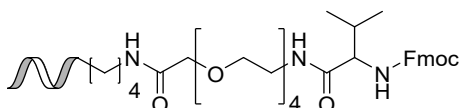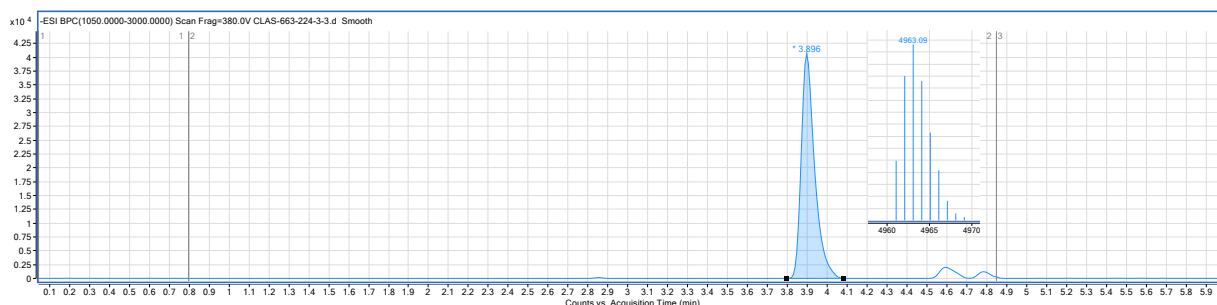

Mass calculated: 4961.07

Mass found: 4961.09

Conversion: 100%.

Synthesised from **6** according to procedure E.V and analysed by mass spectrometry.



## D.V. Valine-Headpiece 2B-SI

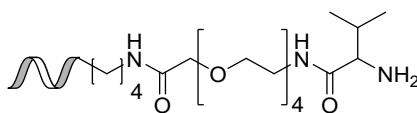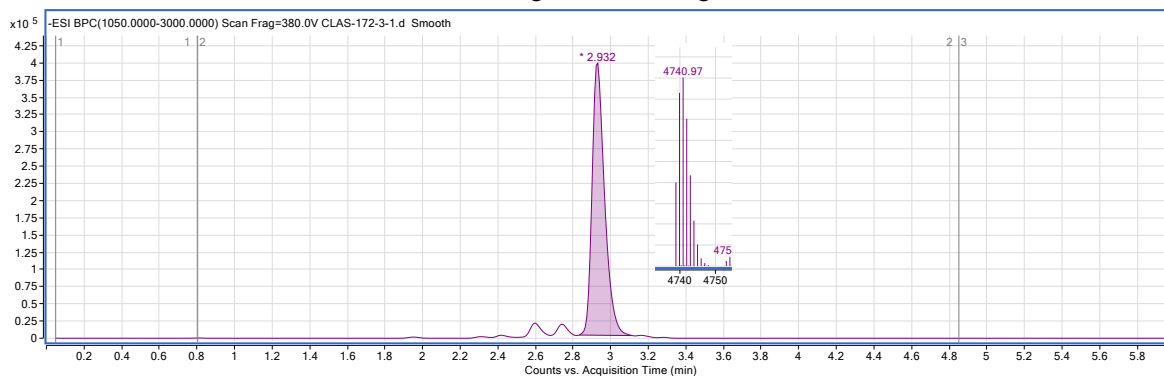

Mass calculated: 4739.00

Mass recorded: 4738.97

Conversion: 100%.

Synthesised from **27** according to procedure D.V. and analysed by mass spectrometry.

## D.VI. 3-iodobenzoyl-Valine-Headpiece (3B-SI)

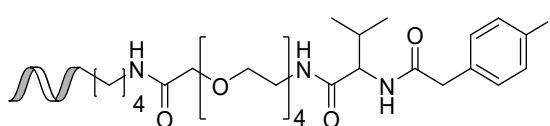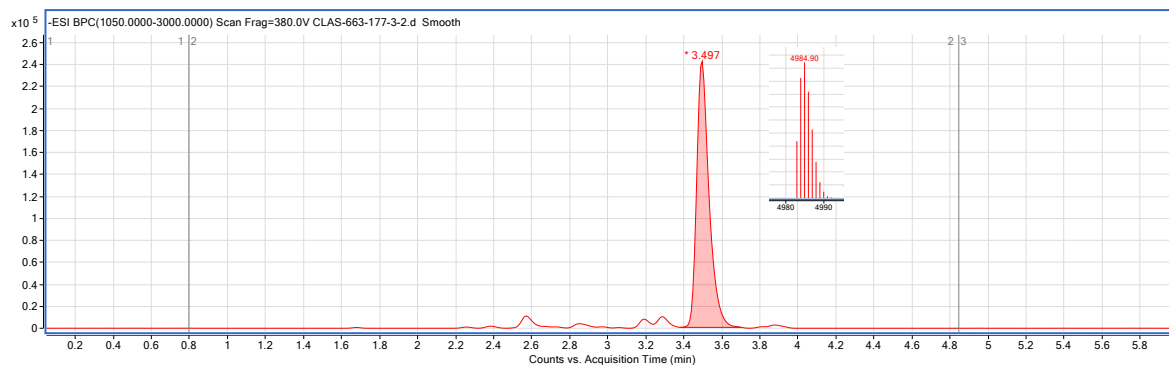

Mass calculated: 4982.94

Mass recorded: 4982.89

Conversion: 100%.

Synthesised from **36** according to procedure D.V. and analysed by mass spectrometry.

| Library Member                                                                      | BB1 Number | BB1                                                                                 | BB1 Codon | BB1 Complementary Codon | BB2 Number | BB2                                                                                  | BB2 Codon | BB2 Complementary Codon |
|-------------------------------------------------------------------------------------|------------|-------------------------------------------------------------------------------------|-----------|-------------------------|------------|--------------------------------------------------------------------------------------|-----------|-------------------------|
| 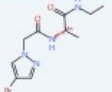   | BB1a       |    | ACTCTGGA  | TCCAGAGT                | BB2a       |    | CTTAGAGC  | GCTCTAAG                |
|    | BB1a       |    | ACTCTGGA  | TCCAGAGT                | BB2b       |    | GATCGACT  | AGTCGATC                |
|    | BB1a       |    | ACTCTGGA  | TCCAGAGT                | BB2c       |    | TCTGGAAC  | GTTCCAGA                |
|    | BB1a       |    | ACTCTGGA  | TCCAGAGT                | BB2d       |    | ATTGACCG  | CGGTCAAT                |
|    | BB1a       |    | ACTCTGGA  | TCCAGAGT                | BB2e       |    | TGTCACGA  | TCGTGACA                |
|    | BB1a       |    | ACTCTGGA  | TCCAGAGT                | BB2f       |    | GCTAACTG  | CAGTTAGC                |
|   | BB1b       |   | GGTGTTAC  | GTAACACC                | BB2a       |   | CTTAGAGC  | GCTCTAAG                |
|  | BB1b       |  | GGTGTTAC  | GTAACACC                | BB2b       |  | GATCGACT  | AGTCGATC                |
|  | BB1b       |  | GGTGTTAC  | GTAACACC                | BB2c       |  | TCTGGAAC  | GTTCCAGA                |
|  | BB1b       |  | GGTGTTAC  | GTAACACC                | BB2d       |  | ATTGACCG  | CGGTCAAT                |
|  | BB1b       |  | GGTGTTAC  | GTAACACC                | BB2e       |  | TGTCACGA  | TCGTGACA                |
|  | BB1b       |  | GGTGTTAC  | GTAACACC                | BB2f       |  | GCTAACTG  | CAGTTAGC                |
|  | BB1c       |  | AGTGCCTG  | ACGACACT                | BB2a       |  | CTTAGAGC  | GCTCTAAG                |
|  | BB1c       |  | AGTGCCTG  | ACGACACT                | BB2b       |  | GATCGACT  | AGTCGATC                |
|  | BB1c       |  | AGTGCCTG  | ACGACACT                | BB2c       |  | TCTGGAAC  | GTTCCAGA                |

| Library Member                                                                      | BB1 Number | BB1                                                                                 | BB1 Codon | BB1 Complementary Codon | BB2 Number | BB2                                                                                  | BB2 Codon | BB2 Complementary Codon |
|-------------------------------------------------------------------------------------|------------|-------------------------------------------------------------------------------------|-----------|-------------------------|------------|--------------------------------------------------------------------------------------|-----------|-------------------------|
| 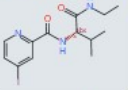   | BB1c       |    | AGTGTCTGT | ACGACACT                | BB2d       |    | ATTGACCG  | CGGTCAAT                |
|    | BB1c       |    | AGTGTCTGT | ACGACACT                | BB2e       |    | TGTCACGA  | TCGTGACA                |
|    | BB1c       |    | AGTGTCTGT | ACGACACT                | BB2f       |    | GCTAACTG  | CAGTTAGC                |
|    | BB1d       |    | GCTCTAAG  | CTTAGAGC                | BB2a       |    | CTTAGAGC  | GCTCTAAG                |
|    | BB1d       |    | GCTCTAAG  | CTTAGAGC                | BB2b       |    | GATCGACT  | AGTCGATC                |
|    | BB1d       |    | GCTCTAAG  | CTTAGAGC                | BB2c       |    | TCTGGAAC  | GTTCCAGA                |
|    | BB1d       |    | GCTCTAAG  | CTTAGAGC                | BB2d       |    | ATTGACCG  | CGGTCAAT                |
|  | BB1d       |  | GCTCTAAG  | CTTAGAGC                | BB2e       |  | TGTCACGA  | TCGTGACA                |
|  | BB1d       |  | GCTCTAAG  | CTTAGAGC                | BB2f       |  | GCTAACTG  | CAGTTAGC                |
|  | BB1e       |  | CATCGTGA  | TCACGATG                | BB2a       |  | CTTAGAGC  | GCTCTAAG                |
|  | BB1e       |  | CATCGTGA  | TCACGATG                | BB2b       |  | GATCGACT  | AGTCGATC                |
|  | BB1e       |  | CATCGTGA  | TCACGATG                | BB2c       |  | TCTGGAAC  | GTTCCAGA                |
|  | BB1e       |  | CATCGTGA  | TCACGATG                | BB2d       |  | ATTGACCG  | CGGTCAAT                |
|  | BB1e       |  | CATCGTGA  | TCACGATG                | BB2e       |  | TGTCACGA  | TCGTGACA                |
|  | BB1e       |  | CATCGTGA  | TCACGATG                | BB2f       |  | GCTAACTG  | CAGTTAGC                |
|  | BB1f       |  | AATCGGTC  | GACCGATT                | BB2a       |  | CTTAGAGC  | GCTCTAAG                |
|  | BB1f       |  | AATCGGTC  | GACCGATT                | BB2b       |  | GATCGACT  | AGTCGATC                |
|  | BB1f       |  | AATCGGTC  | GACCGATT                | BB2c       |  | TCTGGAAC  | GTTCCAGA                |

| Library Member                                                                      | BB1 Number | BB1                                                                                 | BB1 Codon | BB1 Complementary Codon | BB2 Number | BB2                                                                                   | BB2 Codon | BB2 Complementary Codon |
|-------------------------------------------------------------------------------------|------------|-------------------------------------------------------------------------------------|-----------|-------------------------|------------|---------------------------------------------------------------------------------------|-----------|-------------------------|
|    | BB1f       |    | AATCGGTC  | GACCGATT                | BB2c       |    | TCTGGAAC  | GTTCCAGA                |
|    | BB1f       |    | AATCGGTC  | GACCGATT                | BB2d       |    | ATTGACCG  | CGGTCAAT                |
|    | BB1f       |    | AATCGGTC  | GACCGATT                | BB2e       |    | TGTCACGA  | TCGTGACA                |
|    | BB1f       |    | AATCGGTC  | GACCGATT                | BB2f       |    | GCTAACTG  | CAGTTAGC                |
|    | BB1g       |    | ACTGGCTA  | TAGCCAGT                | BB2a       |    | CTTAGAGC  | GCTCTAAG                |
|    | BB1g       |    | ACTGGCTA  | TAGCCAGT                | BB2b       |    | GATCGACT  | AGTCGATC                |
|   | BB1g       |   | ACTGGCTA  | TAGCCAGT                | BB2c       |   | TCTGGAAC  | GTTCCAGA                |
|  | BB1g       |  | ACTGGCTA  | TAGCCAGT                | BB2d       |  | ATTGACCG  | CGGTCAAT                |
|  | BB1g       |  | ACTGGCTA  | TAGCCAGT                | BB2e       |  | TGTCACGA  | TCGTGACA                |
|  | BB1g       |  | ACTGGCTA  | TAGCCAGT                | BB2f       |  | GCTAACTG  | CAGTTAGC                |

## Selection data

### E. Pre-Selection Library Composition:

Read 1

Total sequence count = 173603

| Sequence                                                                         | Count |
|----------------------------------------------------------------------------------|-------|
| TGTAGACCATGTAGTTGAGGTCAGTTCAGATAGGTCACGATGATACTTACATGCAAATCCGTTCC<br>ACACCGACCT  | 5465  |
| TGTAGACCATGTAGTTGAGGTCACAGTTAGCTAGGGTAACACCATACTTACATGCAAATCCGTTCC<br>ACACCGACCT | 5164  |
| TGTAGACCATGTAGTTGAGGTCACAGTTAGCTAGGTCACGATGATACTTACATGCAAATCCGTTCC<br>ACACCGACCT | 5122  |
| TGTAGACCATGTAGTTGAGGTCAGTTCAGATAGGGTAACACCATACTTACATGCAAATCCGTTCC<br>ACACCGACCT  | 5090  |
| TGTAGACCATGTAGTTGAGGTCATCGTGACATAGGGTAACACCATACTTACATGCAAATCCGTTCC<br>ACACCGACCT | 4975  |
| TGTAGACCATGTAGTTGAGGTCAGTTCAGATAGGGACCGATTATACTTACATGCAAATCCGTTCC<br>ACACCGACCT  | 4738  |
| TGTAGACCATGTAGTTGAGGTCAGTTCAGATAGGACGACACTATACTTACATGCAAATCCGTTCC<br>ACACCGACCT  | 4708  |
| TGTAGACCATGTAGTTGAGGTCACAGTTAGCTAGGACGACACTATACTTACATGCAAATCCGTTCC<br>ACACCGACCT | 4645  |
| TGTAGACCATGTAGTTGAGGTCACAGTTAGCTAGGGACCGATTATACTTACATGCAAATCCGTTCC<br>ACACCGACCT | 4643  |
| TGTAGACCATGTAGTTGAGGTCACAGTTAGCTAGGTCAGAGTATACTTACATGCAAATCCGTTCC<br>ACACCGACCT  | 4592  |
| TGTAGACCATGTAGTTGAGGTCATCGTGACATAGGTCAGAGTATACTTACATGCAAATCCGTTCC<br>ACACCGACCT  | 4589  |
| TGTAGACCATGTAGTTGAGGTCACGGTCAATTAGGTCACGATGATACTTACATGCAAATCCGTTCC<br>ACACCGACCT | 4530  |
| TGTAGACCATGTAGTTGAGGTCAGTTCAGATAGGTCAGAGTATACTTACATGCAAATCCGTTCC<br>ACACCGACCT   | 4526  |
| TGTAGACCATGTAGTTGAGGTCATCGTGACATAGGACGACACTATACTTACATGCAAATCCGTTCC<br>ACACCGACCT | 4501  |
| TGTAGACCATGTAGTTGAGGTCATCGTGACATAGGGACCGATTATACTTACATGCAAATCCGTTCC<br>ACACCGACCT | 4488  |

|                                                                                  |      |
|----------------------------------------------------------------------------------|------|
| TGTAGACCATGTAGTTGAGGTCACGGTCAATTAGGGTAACACCATACTTACATGCAAATCCGTTCC<br>ACACCGACCT | 4281 |
| TGTAGACCATGTAGTTGAGGTCACGGTCAATTAGGTCCAGAGTATACTTACATGCAAATCCGTTCC<br>ACACCGACCT | 3926 |
| TGTAGACCATGTAGTTGAGGTCACGGTCAATTAGGACGACACTATACTTACATGCAAATCCGTTCC<br>ACACCGACCT | 3870 |
| TGTAGACCATGTAGTTGAGGTCACGGTCAATTAGGGACCGATTATACTTACATGCAAATCCGTTCC<br>ACACCGACCT | 3779 |
| TGTAGACCATGTAGTTGAGGTCAGCTCTAAGTAGGTCACGATGATACTTACATGCAAATCCGTTCC<br>ACACCGACCT | 3703 |
| TGTAGACCATGTAGTTGAGGTCAGCTCTAAGTAGGGTAACACCATACTTACATGCAAATCCGTTCC<br>ACACCGACCT | 3686 |
| TGTAGACCATGTAGTTGAGGTCAGCTCTAAGTAGGGTAACACCATACTTACATGCAAATCCGTTCC<br>ACACCGACCT | 3670 |
| TGTAGACCATGTAGTTGAGGTCAGCTCTAAGTAGGTCACGATGATACTTACATGCAAATCCGTTCC<br>ACACCGACCT | 3449 |
| TGTAGACCATGTAGTTGAGGTCAGCTCTAAGTAGGTCCAGAGTATACTTACATGCAAATCCGTTCC<br>ACACCGACCT | 3382 |
| TGTAGACCATGTAGTTGAGGTCAGCTCTAAGTAGGGACCGATTATACTTACATGCAAATCCGTTCC<br>ACACCGACCT | 3348 |
| TGTAGACCATGTAGTTGAGGTCAGCTCTAAGTAGGGACCGATTATACTTACATGCAAATCCGTTCC<br>ACACCGACCT | 3259 |
| TGTAGACCATGTAGTTGAGGTCAGCTCTAAGTAGGACGACACTATACTTACATGCAAATCCGTTCC<br>ACACCGACCT | 3240 |
| TGTAGACCATGTAGTTGAGGTCAGCTCTAAGTAGGTCCAGAGTATACTTACATGCAAATCCGTTCC<br>ACACCGACCT | 3192 |
| TGTAGACCATGTAGTTGAGGTCAGCTCTAAGTAGGACGACACTATACTTACATGCAAATCCGTTCC<br>ACACCGACCT | 3072 |
| TGTAGACCATGTAGTTGAGGTCATCGTGACATAGGCTTAGAGCATACTTACATGCAAATCCGTTCC<br>ACACCGACCT | 1931 |
| TGTAGACCATGTAGTTGAGGTCAGTCCAGATAGGCTTAGAGCATACTTACATGCAAATCCGTTCC<br>ACACCGACCT  | 1906 |
| TGTAGACCATGTAGTTGAGGTCATCGTGACATAGGTCACGATGATACTTACATGCAAATCCGTTCC<br>ACACCGACCT | 1894 |
| TGTAGACCATGTAGTTGAGGTCACAGTTAGCTAGGCTTAGAGCATACTTACATGCAAATCCGTTCC<br>ACACCGACCT | 1879 |
| TGTAGACCATGTAGTTGAGGTCACGGTCAATTAGGCTTAGAGCATACTTACATGCAAATCCGTTCC<br>ACACCGACCT | 1615 |

|                                                                                    |      |
|------------------------------------------------------------------------------------|------|
| ACACCGACCT                                                                         |      |
| TGTAGACCATGTAGTTGAGGTCAATGTACGCCAGGTAGCCAGTATACTTACATGCAAATCCGTTCC<br>ACACCGACCT   | 1349 |
| TGTAGACCATGTAGTTGAGGTCAAGTCGATCTAGGCTTAGAGCATACTTACATGCAAATCCGTTCC<br>ACACCGACCT   | 1208 |
| TGTAGACCATGTAGTTGAGGTTCATCGTGACATAGGTAGCCAGTATACTTACATGCAAATCCGTTCC<br>ACACCGACCT  | 991  |
| TGTAGACCATGTAGTTGAGGTCCAGTTAGCTAGGTAGCCAGTATACTTACATGCAAATCCGTTCC<br>ACACCGACCT    | 951  |
| TGTAGACCATGTAGTTGAGGTCCAGTCCAGATAGGTAGCCAGTATACTTACATGCAAATCCGTTCC<br>ACACCGACCT   | 925  |
| TGTAGACCATGTAGTTGAGGTCCAGTCTAAGTAGGCTTAGAGCATACTTACATGCAAATCCGTTCC<br>ACACCGACCT   | 786  |
| TGTAGACCATGTAGTTGAGGTCCAGTCAATTAGGTAGCCAGTATACTTACATGCAAATCCGTTCC<br>ACACCGACCT    | 752  |
| TGTAGACCATGTAGTTGAGGTCCAGTCTAAGTAGGCTTAGCCAGTATACTTACATGCAAATCCGTTCC<br>ACACCGACCT | 699  |
| TGTAGACCATGTAGTTGAGGTCAAGTCGATCTAGGTAGCCAGTATACTTACATGCAAATCCGTTCC<br>ACACCGACCT   | 670  |

Read 2

Total sequence count = 173603

| Sequence                                                                         | Count |
|----------------------------------------------------------------------------------|-------|
| TGTAGACCATGTAGTTGAGGTCCAGTCCAGATAGGTCCAGATGATACTTACATGCAAATCCGTTCC<br>ACACCGACCT | 5527  |
| TGTAGACCATGTAGTTGAGGTCCAGTCCAGATAGGTCCAGATGATACTTACATGCAAATCCGTTCC<br>ACACCGACCT | 5230  |
| TGTAGACCATGTAGTTGAGGTCCAGTCCAGATAGGTCCAGATGATACTTACATGCAAATCCGTTCC<br>ACACCGACCT | 5156  |
| TGTAGACCATGTAGTTGAGGTCCAGTCCAGATAGGTCCAGATGATACTTACATGCAAATCCGTTCC<br>ACACCGACCT | 5145  |
| TGTAGACCATGTAGTTGAGGTCCAGTCCAGATAGGTCCAGATGATACTTACATGCAAATCCGTTCC<br>ACACCGACCT | 5036  |
| TGTAGACCATGTAGTTGAGGTCCAGTCCAGATAGGTCCAGATGATACTTACATGCAAATCCGTTCC<br>ACACCGACCT | 4780  |

|                                                                                  |      |
|----------------------------------------------------------------------------------|------|
| ACACCGACCT                                                                       |      |
| TGTAGACCATGTAGTTGAGGTCAGTTCAGATAGGACGACACTATACTTACATGCAAATCCGTTCC<br>ACACCGACCT  | 4731 |
| TGTAGACCATGTAGTTGAGGTCACAGTTAGCTAGGGACCGATTATACTTACATGCAAATCCGTTCC<br>ACACCGACCT | 4696 |
| TGTAGACCATGTAGTTGAGGTCACAGTTAGCTAGGACGACACTATACTTACATGCAAATCCGTTCC<br>ACACCGACCT | 4685 |
| TGTAGACCATGTAGTTGAGGTCACAGTTAGCTAGGTCCAGAGTATACTTACATGCAAATCCGTTCC<br>ACACCGACCT | 4670 |
| TGTAGACCATGTAGTTGAGGTCATCGTGACATAGGTCCAGAGTATACTTACATGCAAATCCGTTCC<br>ACACCGACCT | 4669 |
| TGTAGACCATGTAGTTGAGGTCAGTTCAGATAGGTCCAGAGTATACTTACATGCAAATCCGTTCC<br>ACACCGACCT  | 4593 |
| TGTAGACCATGTAGTTGAGGTCACGGTCAATTAGGTCCAGATGATACTTACATGCAAATCCGTTCC<br>ACACCGACCT | 4575 |
| TGTAGACCATGTAGTTGAGGTCATCGTGACATAGGACGACACTATACTTACATGCAAATCCGTTCC<br>ACACCGACCT | 4545 |
| TGTAGACCATGTAGTTGAGGTCATCGTGACATAGGGACCGATTATACTTACATGCAAATCCGTTCC<br>ACACCGACCT | 4537 |
| TGTAGACCATGTAGTTGAGGTCACGGTCAATTAGGGTAACACCATACTTACATGCAAATCCGTTCC<br>ACACCGACCT | 4337 |
| TGTAGACCATGTAGTTGAGGTCACGGTCAATTAGGTCCAGAGTATACTTACATGCAAATCCGTTCC<br>ACACCGACCT | 3986 |
| TGTAGACCATGTAGTTGAGGTCACGGTCAATTAGGACGACACTATACTTACATGCAAATCCGTTCC<br>ACACCGACCT | 3924 |
| TGTAGACCATGTAGTTGAGGTCACGGTCAATTAGGGACCGATTATACTTACATGCAAATCCGTTCC<br>ACACCGACCT | 3835 |
| TGTAGACCATGTAGTTGAGGTCAGCTCTAAGTAGGTCCAGATGATACTTACATGCAAATCCGTTCC<br>ACACCGACCT | 3747 |
| TGTAGACCATGTAGTTGAGGTCAGCTCTAAGTAGGTCCAGATGATACTTACATGCAAATCCGTTCC<br>ACACCGACCT | 3732 |
| TGTAGACCATGTAGTTGAGGTCAGCTCTAAGTAGGGTAACACCATACTTACATGCAAATCCGTTCC<br>ACACCGACCT | 3724 |
| TGTAGACCATGTAGTTGAGGTCAGCTCTAAGTAGGTCCAGATGATACTTACATGCAAATCCGTTCC<br>ACACCGACCT | 3534 |



|                                                                                  |      |
|----------------------------------------------------------------------------------|------|
| ACACCGACCT                                                                       |      |
| TGTAGACCATGTAGTTGAGGTCAGCTCTAAGTAGGTCCAGAGTATACTTACATGCAAATCCGTTCC<br>ACACCGACCT | 3414 |
| TGTAGACCATGTAGTTGAGGTCAGCTCTAAGTAGGGACCGATTATACTTACATGCAAATCCGTTCC<br>ACACCGACCT | 3395 |
| TGTAGACCATGTAGTTGAGGTCAGCTCTAAGTAGGGACCGATTATACTTACATGCAAATCCGTTCC<br>ACACCGACCT | 3322 |
| TGTAGACCATGTAGTTGAGGTCAGCTCTAAGTAGGTCCAGAGTATACTTACATGCAAATCCGTTCC<br>ACACCGACCT | 3285 |
| TGTAGACCATGTAGTTGAGGTCAGCTCTAAGTAGGACGACACTATACTTACATGCAAATCCGTTCC<br>ACACCGACCT | 3279 |
| TGTAGACCATGTAGTTGAGGTCAGCTCTAAGTAGGACGACACTATACTTACATGCAAATCCGTTCC<br>ACACCGACCT | 3121 |
| TGTAGACCATGTAGTTGAGGTCATCGTGACATAGGCTTAGAGCATACTTACATGCAAATCCGTTCC<br>ACACCGACCT | 1947 |
| TGTAGACCATGTAGTTGAGGTCATCGTGACATAGGTCACGATGATACTTACATGCAAATCCGTTCC<br>ACACCGACCT | 1941 |
| TGTAGACCATGTAGTTGAGGTCAGTTCCAGATAGGCTTAGAGCATACTTACATGCAAATCCGTTCC<br>ACACCGACCT | 1929 |
| TGTAGACCATGTAGTTGAGGTCACAGTTAGCTAGGCTTAGAGCATACTTACATGCAAATCCGTTCC<br>ACACCGACCT | 1898 |
| TGTAGACCATGTAGTTGAGGTCACGGTCAATTAGGCTTAGAGCATACTTACATGCAAATCCGTTCC<br>ACACCGACCT | 1641 |
| TGTAGACCATGTAGTTGAGGTCATGTACGCCAGGTAGCCAGTATACTTACATGCAAATCCGTTCC<br>ACACCGACCT  | 1369 |
| TGTAGACCATGTAGTTGAGGTCAGCTCTAAGTAGGTCCAGAGTATACTTACATGCAAATCCGTTCC<br>ACACCGACCT | 1247 |
| TGTAGACCATGTAGTTGAGGTCACAGTTAGCTAGGTAGCCAGTATACTTACATGCAAATCCGTTCC<br>ACACCGACCT | 962  |
| TGTAGACCATGTAGTTGAGGTCAGTTCCAGATAGGTAGCCAGTATACTTACATGCAAATCCGTTCC<br>ACACCGACCT | 939  |
| TGTAGACCATGTAGTTGAGGTCAGCTCTAAGTAGGCTTAGAGCATACTTACATGCAAATCCGTTCC<br>ACACCGACCT | 789  |
| TGTAGACCATGTAGTTGAGGTCACGGTCAATTAGGTAGCCAGTATACTTACATGCAAATCCGTTCC<br>ACACCGACCT | 768  |

|                                                                   |     |
|-------------------------------------------------------------------|-----|
| ACACCGACCT                                                        |     |
| CAAAGACCCAACGAGAAGAGCACACGTCTGAACTCCAGTCATGTGGATACGCTGCTT         | 761 |
| TGTAGACCATGTAGTTGAGGTCAGCTCTAAGTAGGTAGCCAGTATACTTACATGCAAATCCGTTC | 710 |
| ACACCGACCT                                                        |     |
| TGTAGACCATGTAGTTGAGGTCAGTCGATCTAGGTAGCCAGTATACTTACATGCAAATCCGTTC  | 690 |
| ACACCGACCT                                                        |     |

**E.I. Selection Output Composition:**

Read 1 Overall (anything with >100 reads)

Read 1 Total sequence count = 153396

| Sequence                                                                                | Count | Length | BB 2          |           | BB 1          |            |
|-----------------------------------------------------------------------------------------|-------|--------|---------------|-----------|---------------|------------|
|                                                                                         |       |        | BB 2 Sequence | BB2 Count | BB 1 Sequence | BB 1 Count |
| TGTAGACCATGTAGTTGAGGTCAATGTACGCTAGGTAGCCAGTA<br>TACTTACATGCAAATCCGTTACACCGACCT          | 28553 | 75     | ATGTACGC      | 42401     | TAGCCAGT      | 44666      |
| TGTAGACCATGTAGTTGAGGTCAAGTCTAAGTAGGTCCAGAGTA<br>TACTTACATGCAAATCCGTTACACCGACCT          | 25824 | 75     | GCTCTAAG      | 36871     | TCCAGAGT      | 39620      |
| TGTAGACCATGTAGTTGAGGTCAATGTACGCCAGGTAGCCAGTA<br>TACTTACATGCAAATCCGTTACACCGACCT          | 9466  | 75     | GTTCCAGA      | 15879     | GACCGATT      | 16446      |
| TGTAGACCATGTAGTTGAGGTCAAGTGCCGTCGTATGTGCGCGT<br>AGGAGTCGATCATAACAGCCAAATCCGTTACACCGACCT | 6219  | 83     | CGGTCAAT      | 14693     | GTAACACC      | 14499      |
| TGTAGACCATGTAGTTGAGGTCAAGTCCAGATAGGGACCGATTA<br>TACTTACATGCAAATCCGTTACACCGACCT          | 2905  | 75     | CAGTTAGC      | 14619     | TCACGATG      | 14046      |
| TGTAGACCATGTAGTTGAGGTCAATCGTGACATAGGGACCGATTA<br>TACTTACATGCAAATCCGTTACACCGACCT         | 2829  | 75     | TCGTGACA      | 13746     | ACGACACT      | 13080      |
| TGTAGACCATGTAGTTGAGGTCAAGTCCAGATAGGTACAGATGA<br>TACTTACATGCAAATCCGTTACACCGACCT          | 2796  | 75     | AGTCGATC      | 10645     | CTTAGAGC      | 5519       |
| TGTAGACCATGTAGTTGAGGTCAAGTCCAGATAGGTACAGATGA<br>TACTTACATGCAAATCCGTTACACCGACCT          | 2667  | 75     | ATGTACGT      | 336       | TAGCTAGT      | 385        |
| TGTAGACCATGTAGTTGAGGTCAATGTGTACGTAGACGCTATTA<br>GGTCTTCTCCATACCAAATCCGTTACACCGACCT      | 2633  | 80     | ATGTATGC      | 243       | TAGCCCGT      | 226        |

|                                                                                  |      |    |          |     |          |     |
|----------------------------------------------------------------------------------|------|----|----------|-----|----------|-----|
| TGTAGACCATGTAGTTGAGGTCACGGTCAATTAGGGACCGATTA<br>TACTTACATGCAAATCCGTTACACCCGACCT  | 2593 | 75 | ATGTACAC | 142 | TAGTCAGT | 224 |
| TGTAGACCATGTAGTTGAGGTCAGTTCAGATAGGGTAAACACCA<br>TACTTACATGCAAATCCGTTACACCCGACCT  | 2533 | 75 | TGGTCAAT | 114 | TAGTTAGT | 172 |
| TGTAGACCATGTAGTTGAGGTCACAGTTAGCTAGGTCACGATGA<br>TACTTACATGCAAATCCGTTACACCCGACCT  | 2459 | 75 | GTGTACGC | 103 | CCCAGAGT | 143 |
| TGTAGACCATGTAGTTGAGGTCACGGTCAATTAGGGTAAACACCA<br>TACTTACATGCAAATCCGTTACACCCGACCT | 2452 | 75 | GCCCTAAG | 100 | TAGCAAGT | 138 |
| TGTAGACCATGTAGTTGAGGTCACGGTCAATTAGGTCACGATGA<br>TACTTACATGCAAATCCGTTACACCCGACCT  | 2435 | 75 | GTTCCAAA | 93  | TCCAGGGT | 132 |
| TGTAGACCATGTAGTTGAGGTCAGTTCAGATAGGTCCAGAGTA<br>TACTTACATGCAAATCCGTTACACCCGACCT   | 2401 | 75 | ACGTACGC | 92  | TAACCAGT | 107 |
| TGTAGACCATGTAGTTGAGGTCATCGTGACATAGGTCCAGAGTA<br>TACTTACATGCAAATCCGTTACACCCGACCT  | 2364 | 75 | GCTCTAGG | 89  | TCCAAAGT | 86  |
| TGTAGACCATGTAGTTGAGGTCATCGTGACATAGGGTAAACACCA<br>TACTTACATGCAAATCCGTTACACCCGACCT | 2358 | 75 | ATGTACTC | 88  | TAGCCAGC | 84  |
| TGTAGACCATGTAGTTGAGGTCACGGTCAATTAGGTCCAGAGTA<br>TACTTACATGCAAATCCGTTACACCCGACCT  | 2353 | 75 | GCTCTAAA | 78  | TAGCCAAT | 84  |
| TGTAGACCATGTAGTTGAGGTCAGTTCAGATAGGACGACACTA<br>TACTTACATGCAAATCCGTTACACCCGACCT   | 2319 | 75 | GCTCCAGA | 77  | TGGCCAGT | 83  |
| TGTAGACCATGTAGTTGAGGTCACAGTTAGCTAGGGTAAACACCA<br>TACTTACATGCAAATCCGTTACACCCGACCT | 2280 | 75 | GTTCTAAG | 67  | TCCAGAGC | 83  |
| TGTAGACCATGTAGTTGAGGTCACAGTTAGCTAGGTCCAGAGTA<br>TACTTACATGCAAATCCGTTACACCCGACCT  | 2250 | 75 | ATGCACGC | 65  | TTCAGAGT | 82  |

|                                                                                       |      |    |          |    |          |    |
|---------------------------------------------------------------------------------------|------|----|----------|----|----------|----|
| TGTAGACCATGTAGTTGAGGTCATCGTGACATAGGACGACACTA<br>TACTTACATGCAAATCCGTTACACCCGACCT       | 2171 | 75 | ACTCTAAG | 64 | TCTAGAGT | 81 |
| TGTAGACCATGTAGTTGAGGTCACAGTTAGCTAGGACGACACTA<br>TACTTACATGCAAATCCGTTACACCCGACCT       | 2158 | 75 | CTGTCAAT | 59 | TTACGATG | 80 |
| TGTAGACCATGTAGTTGAGGTCACGGTCAATTAGGACGACACTA<br>TACTTACATGCAAATCCGTTACACCCGACCT       | 2137 | 75 | GTTCCAGG | 58 | TCCGGAGT | 79 |
| TGTAGACCATGTAGTTGAGGTCAGCTCTAAGTAGGGACCGATTA<br>TACTTACATGCAAATCCGTTACACCCGACCT       | 2077 | 75 | GTTACAGA | 58 | TCATGATG | 77 |
| TGTAGACCATGTAGTTGAGGTCAGCTCTAAGTCGATCTAGGGACCGATTA<br>TACTTACATGCAAATCCGTTACACCCGACCT | 1889 | 75 | CAGTTAAC | 55 | GTAACACT | 75 |
| TGTAGACCATGTAGTTGAGGTCAGCTCTAAGTAGGTCACGATGA<br>TACTTACATGCAAATCCGTTACACCCGACCT       | 1863 | 75 | ATGTGCGC | 55 | TCACAATG | 73 |
| TGTAGACCATGTAGTTGAGGTCAGCTCTAAGTAGGGTAACACCA<br>TACTTACATGCAAATCCGTTACACCCGACCT       | 1839 | 75 | TCGTGATA | 54 | TCACGATT | 73 |
| TGTAGACCATGTAGTTGAGGTCAGCTCTAAGTCGATCTAGGTCACGATGA<br>TACTTACATGCAAATCCGTTACACCCGACCT | 1787 | 75 | GCTTTAAG | 54 | ACGACATT | 71 |
| TGTAGACCATGTAGTTGAGGTCAGCTCTAAGTCGATCTAGGGTAACACCA<br>TACTTACATGCAAATCCGTTACACCCGACCT | 1745 | 75 | CAGTTAGT | 53 | AACCGATT | 71 |
| TGTAGACCATGTAGTTGAGGTCAGCTCTAAGTAGGACGACACTA<br>TACTTACATGCAAATCCGTTACACCCGACCT       | 1623 | 75 | CAGTCAAT | 53 | ATAACACC | 71 |
| TGTAGACCATGTAGTTGAGGTCAGCTCTAAGTCGATCTAGGTCCAGAGTA<br>TACTTACATGCAAATCCGTTACACCCGACCT | 1602 | 75 | CGGCCAAT | 52 | CAGCCAGT | 70 |
| TGTAGACCATGTAGTTGAGGTCAGCTCTAAGTCGATCTAGGACGACACTA<br>TACTTACATGCAAATCCGTTACACCCGACCT | 1550 | 75 | GCTATAAG | 51 | TAGCCGGT | 69 |

|                                                                                 |      |    |          |    |          |    |
|---------------------------------------------------------------------------------|------|----|----------|----|----------|----|
| TGTAGACCATGTAGTTGAGGTCATCGTGACATAGGTCACGATGA<br>TACTTACATGCAAATCCGTTACACCGACCT  | 1410 | 75 | ATATACGC | 50 | ACAACACT | 63 |
| TGTAGACCATGTAGTTGAGGTCAGTTCAGATAGGCTTAGAGCA<br>TACTTACATGCAAATCCGTTACACCGACCT   | 1031 | 75 | GCTCCAAG | 46 | GACTGATT | 61 |
| TGTAGACCATGTAGTTGAGGTCACAGTTAGCTAGGCTTAGAGCA<br>TACTTACATGCAAATCCGTTACACCGACCT  | 929  | 75 | TCGTAACA | 46 | TCAAGAGT | 59 |
| TGTAGACCATGTAGTTGAGGTCATCGTGACATAGGCTTAGAGCA<br>TACTTACATGCAAATCCGTTACACCGACCT  | 926  | 75 | GGTCGATC | 45 | TATCCAGT | 59 |
| TGTAGACCATGTAGTTGAGGTCACGGTCAATTAGGCTTAGAGCA<br>TACTTACATGCAAATCCGTTACACCGACCT  | 901  | 75 | GTTCTAGA | 44 | GTAATACC | 59 |
| TGTAGACCATGTAGTTGAGGTC AAGTCGATCTAGGCTTAGAGCA<br>TACTTACATGCAAATCCGTTACACCGACCT | 630  | 75 | TTGTGACA | 44 | TAGCCACT | 56 |
| TGTAGACCATGTAGTTGAGGTCAGCTCTAAGTAGGCTTAGAGCA<br>TACTTACATGCAAATCCGTTACACCGACCT  | 578  | 75 | ATGTATGT | 43 | GGCCGATT | 54 |
| TGTAGACCATGTAGTTGAGGTCACAGTTAGCTAGGTAGCCAGTA<br>TACTTACATGCAAATCCGTTACACCGACCT  | 495  | 75 | AGTCGATT | 42 | TCCAGAAT | 53 |
| TGTAGACCATGTAGTTGAGGTCACGGTCAATTAGGTAGCCAGTA<br>TACTTACATGCAAATCCGTTACACCGACCT  | 460  | 75 | AGTTGATC | 42 | GTAACACA | 53 |
| TGTAGACCATGTAGTTGAGGTCAGTTCAGATAGGTAGCCAGTA<br>TACTTACATGCAAATCCGTTACACCGACCT   | 447  | 75 | TCATGACA | 41 | ATGACACT | 52 |
| TGTAGACCATGTAGTTGAGGTCATCGTGACATAGGTAGCCAGTA<br>TACTTACATGCAAATCCGTTACACCGACCT  | 440  | 75 | CCGTGACA | 41 | TCCATAGT | 50 |
| TGTAGACCATGTAGTTGAGGTC AATGTACGCTATGTAGCCAGTAT<br>ACTTACATGCAAATCCGTTACACCGACCT | 399  | 75 | GTTTCAGA | 40 | ACGATACT | 48 |

|                                                                                                                                                                                                                                       |     |     |          |    |          |    |
|---------------------------------------------------------------------------------------------------------------------------------------------------------------------------------------------------------------------------------------|-----|-----|----------|----|----------|----|
| TATCGCTGGATGTGTCTGCGGCGTTTTATCATCTTCTTCCATCC<br>TGCTGCTATGCCTCATCTTCTTGTGGTTCTTCTGGACTATCAAGG<br>TATGTTGCCGTTTGTCTCTAATTCCAGGATCCTCAACCACCAGC<br>ACGGGACCATGCCGAACCTGCATGACTACTGCTCAAGGAACCTC<br>TATGTATCCCTCTGTTGCTGTACCAAACCTTCGGAC | 329 | 219 | GTTCAAGA | 38 | GATCGATT | 47 |
| TGTAGACCATGTAGTTGAGGTCAAGTCTAAGTAGGTAGCCAGTA<br>TACTTACATGCAAATCCGTTACACCCGACCT                                                                                                                                                       | 315 | 75  | GTTCCGGA | 37 | ACGACACC | 46 |
| TGTAGACCATGTAGTTGAGGTCAAGTCTAAGTAGGTAGCCAGTA<br>TACTTACATGCAAATCCGTTACACCCGACCT                                                                                                                                                       | 301 | 75  | CGGTAAAT | 37 | GCGACACT | 45 |
| TGTAGACCATGTAGTTGAGGTCAATGTACGCTAGGTAGCTAGTA<br>TACTTACATGCAAATCCGTTACACCCGACCT                                                                                                                                                       | 290 | 75  | ATTTACGC | 36 | CTTAAAGC | 44 |
| TGTAGACCATGTAGTTGAGGTCAATGTACGTTAGGTAGCCAGTA<br>TACTTACATGCAAATCCGTTACACCCGACCT                                                                                                                                                       | 258 | 75  | CAGTTGGC | 36 | CCACGATG | 44 |
| TGTAGACCATGTAGTTGAGGTCAATGTATGCTAGGTAGCCAGTA<br>TACTTACATGCAAATCCGTTACACCCGACCT                                                                                                                                                       | 194 | 75  | GCTCTGAG | 36 | CTTAGAGT | 43 |
| TGTAGACCATGTAGTTGAGGTCAATGTACGCTAGGTAGTCAGTA<br>TACTTACATGCAAATCCGTTACACCCGACCT                                                                                                                                                       | 171 | 75  | CGGTTAAT | 35 | GACAGATT | 42 |
| TGTAGACCATGTAGTTGAGGTCAATGTACGCTAGGTAGCCAGTA<br>TATTACATGCAAATCCGTTACACCCGACCT                                                                                                                                                        | 142 | 74  | TCGTGGCA | 35 | TACAGAGT | 42 |
| TGTAGACCATGTAGTTGAGGTCAATGTACGCTAGGTAGCCGTA<br>TACTTACATGCAAATCCGTTACACCCGACCT                                                                                                                                                        | 134 | 75  | TAGTTAGC | 34 | TAGCCAGA | 41 |
| TGTAGACCATGTAGTTGAGGTCAAGCAATATTCGTAGTACATGCTA<br>GGGCGTGTGCATACCAAATCCGTTACACCCGACCT                                                                                                                                                 | 131 | 80  | AGTAGATC | 33 | TCACGATA | 41 |
| TGTAGACCATGTAGTTGAGGTCAATGTACGCTAGGTAGTTAGTA                                                                                                                                                                                          | 127 | 75  | ATTCCAGA | 33 | GACCAATT | 40 |

|                                             |     |    |          |    |          |    |
|---------------------------------------------|-----|----|----------|----|----------|----|
| TACTTACATGCAAATCCGTTACACCGACCT              |     |    |          |    |          |    |
| TGTAGACCATGTAGTTGAGGTCAGCTCTAAGTAGGCCAGAGTA | 103 | 75 | ATGTACGA | 32 | TCCCGAGT | 38 |
| TACTTACATGCAAATCCGTTACACCGACCT              |     |    |          |    |          |    |



## E.II. Enrichments by Selection

Read 2

| Selection Input Library |       | Selection Output |           | Enrichment | Frequency in selection |
|-------------------------|-------|------------------|-----------|------------|------------------------|
| Sequence                | Count | BB2 Sequence     | BB2 Count |            |                        |
| AGTCGATC                | 19357 | AGTCGATC         | 10645     | 0.5356     | 7                      |
| ATGTACGC                | 1792  | ATGTACGC         | 42401     | 23.0437    | 1                      |
| CAGTTAGC                | 27917 | CAGTTAGC         | 14619     | 0.5100     | 5                      |
| CGGTCAAT                | 23637 | CGGTCAAT         | 14693     | 0.6054     | 4                      |
| GCTCTAAG                | 19566 | GCTCTAAG         | 36871     | 1.8353     | 2                      |
| GTTCCAGA                | 28371 | GTTCCAGA         | 15879     | 0.5451     | 3                      |
| TCGTGACA                | 24329 | TCGTGACA         | 13746     | 0.5503     | 6                      |

Read 1

| Selection Input Library |       | Selection Output |           | Enrichment | Frequency in selection |
|-------------------------|-------|------------------|-----------|------------|------------------------|
| Sequence                | Count | BB1 sequence     | BB1 Count |            |                        |
| ACGACACT                | 24867 | ACGACACT         | 13080     | 0.5137     | 6                      |
| CTTAGAGC                | 9650  | CTTAGAGC         | 5519      | 0.5586     | 7                      |
| GACCGATT                | 25108 | GACCGATT         | 16446     | 0.6398     | 3                      |
| GTAACACC                | 27766 | GTAACACC         | 14499     | 0.5100     | 4                      |
| TAGCCAGT                | 6946  | TAGCCAGT         | 44666     | 6.2807     | 1                      |
| TCACGATG                | 25012 | TCACGATG         | 14046     | 0.5485     | 5                      |
| TCCAGAGT                | 25083 | TCCAGAGT         | 39620     | 1.5428     | 2                      |

|                                                 |        |
|-------------------------------------------------|--------|
| Read count minus JQ1 from selection             | 115377 |
| Number of reads for <b>22</b>                   | 25824  |
| Representation of <b>22</b> in selection output | 0.2238 |
| Read count for clean library                    | 173603 |
| Read count for <b>22</b> in clean library       | 3382   |
| Representation in clean library                 | 0.0195 |
| Enrichment of <b>22</b> by selection            | 11.5   |



## Off-DNA Synthesis

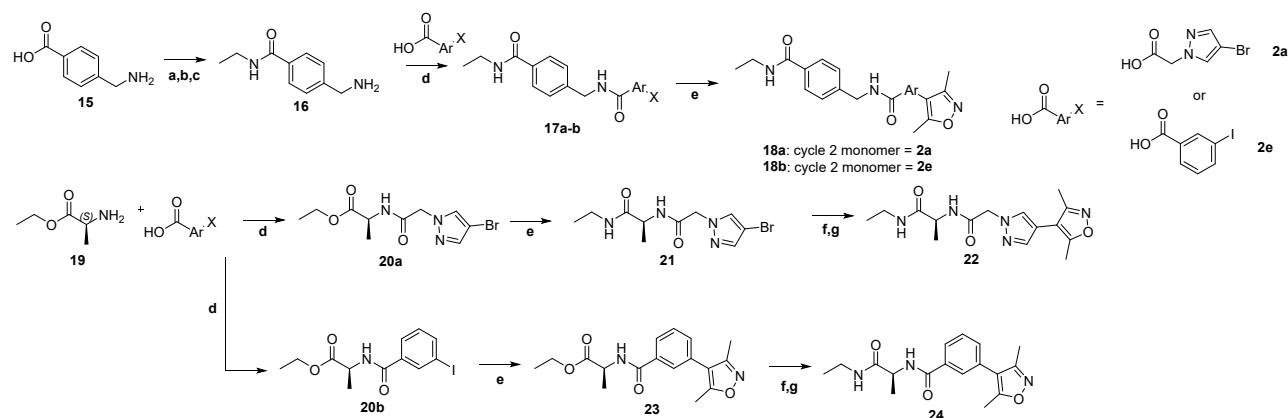

Scheme 5 1 a) TFAA; b)  $\text{SOCl}_2$ ; c)  $\text{NH}_2\text{Et}$  in THF 2M; d) HATU, DIPEA, DCM e)  $\text{Pd}(\text{dtbpf})\text{Cl}_2$ ,  $\text{Cs}_2\text{CO}_3$ , Diox./ $\text{H}_2\text{O}$  10:1, 3,5-dimethyl-4-(4,4,5,5-tetramethyl-1,3,2-dioxaborolan-2-yl)isoxazole; f)  $\text{LiOH}$ , THF/ $\text{H}_2\text{O}$  1:1; g) HATU, DIPEA, DCM,  $\text{NH}_2\text{Et}$  in THF 2M.

### F. Chemistry

#### General Procedure A:

Flask charged with acid starting material (1 eqv.), HATU (1 eqv.), DIPEA (2.5 eqv.) and then dissolved in dry DCM (0.35 M) under  $\text{N}_2$ . Preactivated for 10 minutes at room temperature, before the amine reactant was added to the solution. Stirred at room temperature for 16 hrs. Dried under vacuum and purified by reverse phase flash chromatography 5→95% ACN in  $\text{HCO}_2\text{H}$  0.1% (aq).

#### General Procedure B:

Aryl halide (1 eqv.), 3,5-dimethyl-4-(4,4,5,5-tetramethyl-1,3,2-dioxaborolan-2-yl)isoxazole (1.1 eqv.),  $\text{Cs}_2\text{CO}_3$  (2 eqv.), and  $\text{Pd}(\text{dtbpf})\text{Cl}_2$  (10 mol%) were dissolved in a degassed dioxane water mixture 10:1 under  $\text{N}_2$ . The reaction was heated to  $100^\circ\text{C}$  for 3 hr. Reaction mixture filtered through celite, and the filtrate dried under vacuum and purified by reverse phase flash chromatography 5→95% ACN in  $\text{HCO}_2\text{H}$  0.1% (aq).

#### General Procedure C:

Ester (1 eqv.) dissolved in 1:1 mixture of  $\text{H}_2\text{O}/\text{THF}$  (2 mL),  $\text{LiOH}\cdot\text{H}_2\text{O}$  (1 eqv.) added. Reaction stirred vigorously for 1 hour at room temperature. Reaction dried under vacuum, before resuspending the residue in dry DCM (0.15 M). The solution was degassed, and the atmosphere purged with  $\text{N}_2$  to the solution was added HATU (2.0 eqv.), DIPEA (2.5 eqv.), and  $\text{EtNH}_2$  2M in THF (5 eqv.). Dried under vacuum and purified by reverse phase flash chromatography 5→95% ACN in  $\text{HCO}_2\text{H}$  0.1% (aq).

F.I. N-ethyl-4-((2,2,2-trifluoroacetamido)methyl)benzamide **16-SI**

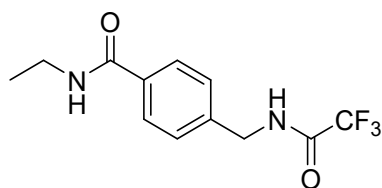

Aminomethylbenzoic acid **16** (13.2 mmol, 2 g) was dissolved in DCM (30mL) and pyridine (4 mmol, 4.4 mL) under N<sub>2</sub> and cooled to 0°C. Trifluoroacetic acid (26.4 mmol, 3.75 mL) was added slowly and allowed to warm to room temperature and stir for 2 hours. The solvent was dried under vacuum. The residue was resuspended in thionyl chloride (132 mmol, 10 mL) at 0°C under N<sub>2</sub>. Allowed to warm to room temperature and stir for 3 hours. The liquid was dried under vacuum then the residue was resuspended in DCM (30 mL) dry under N<sub>2</sub>. To the solution was added EtNH<sub>2</sub>.HCl (132 mmol, 10.8 g) and pyridine (12.4 mL), dropwise. The mixture stirred overnight at room temperature. The reaction was worked up by diluting with additional DCM, washing with water x3 and sat. NaHCO<sub>3</sub>. The product, N-ethyl-4-((2,2,2-trifluoroacetamido)methyl)benzamide, crashed out into the organic layer and was collected by filtration. White solid (1.57 g, 43%). <sup>1</sup>H NMR (500 MHz, Methanol-*d*<sub>4</sub>) δ 9.39 – 9.33 (m, 2H), 8.98 – 8.92 (m, 2H), 6.47 (s, 7H), 6.07 (s, 2H), 4.96 (q, *J* = 7.2 Hz, 2H), 2.78 (t, *J* = 7.3 Hz, 3H). <sup>13</sup>C NMR (126 MHz, Methanol-*d*<sub>4</sub>) δ 168.22, 157.51, 140.78, 133.76, 127.30, 127.22, 117.33, 115.05, 48.11, 47.94, 47.77, 47.60, 47.43, 47.26, 47.09, 42.44, 34.43, 13.49. Calculated for C<sub>12</sub>H<sub>13</sub>F<sub>3</sub>N<sub>2</sub>O<sub>2</sub> [MH]<sup>+</sup> 275.1, LCMS [MH]<sup>+</sup> 275.3.

F.II. 4-(aminomethyl)-N-ethylbenzamide **16**

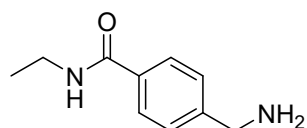

N-ethyl-4-((2,2,2-trifluoroacetamido)methyl)benzamide (5.73 mmol, 1.57 g) was dissolved in MeOH/NH<sub>4</sub>OH 1:1 and heated to 60°C 8 hrs. Solvent removed under vacuum. Purified by flash chromatography, amine column 0→10% MeOH in DCM. White solid (0.85 g, 84%). <sup>1</sup>H NMR (500 MHz, Methanol-*d*<sub>4</sub>) δ 7.92 – 7.86 (m, 2H), 7.58 – 7.52 (m, 2H), 4.18 (s, 2H), 3.42 (q, *J* = 7.3 Hz, 2H), 1.23 (t, *J* = 7.3 Hz, 3H). <sup>13</sup>C NMR (126 MHz, Methanol-*d*<sub>4</sub>) δ 167.73, 136.45, 135.10, 128.64, 127.62, 48.11, 47.93, 47.76, 47.59, 47.42, 47.25, 47.08, 42.44, 34.49, 13.46. Calculated for C<sub>10</sub>H<sub>15</sub>N<sub>2</sub>O [MH]<sup>+</sup> 179.2, LCMS [MH]<sup>+</sup> 179.1.

F.III. 4-((2-(4-bromo-1H-pyrazol-1-yl)acetamido)methyl)-N-ethylbenzamide **17a**

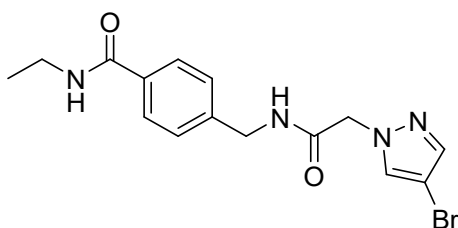

Compound **17a** was synthesised from 2-(4-bromo-1H-pyrazol-1-yl)acetic acid (3.54 mmol, 0.73 g) and **16** (0.42 g, 2.36 mmol) by general procedure A. White solid (0.86 g, 73%).  $^1\text{H}$  NMR (500 MHz, Methanol- $d_4$ )  $\delta$  7.81 (d,  $J$  = 0.7 Hz, 1H), 7.79 – 7.76 (m, 2H), 7.53 (d,  $J$  = 0.6 Hz, 1H), 7.40 – 7.35 (m, 2H), 4.91 (s, 9H), 4.45 (s, 2H), 3.40 (q,  $J$  = 7.2 Hz, 2H), 1.22 (t,  $J$  = 7.2 Hz, 3H).  $^{13}\text{C}$  NMR (126 MHz, Methanol- $d_4$ )  $\delta$  169.70, 169.06, 143.27, 141.62, 134.75, 133.28, 128.55, 128.50, 94.43, 55.50, 49.51, 49.34, 49.17, 49.00, 48.83, 48.66, 48.49, 43.83, 35.82, 14.91. Calculated for  $\text{C}_{15}\text{H}_{18}^{79}\text{Br N}_4\text{O}_2$   $[\text{MH}]^+$  364.1, LCMS  $[\text{MH}]^+$  364.0.

F.IV. N-(4-(ethylcarbamoyl)benzyl)-3-iodobenzamide **17b**

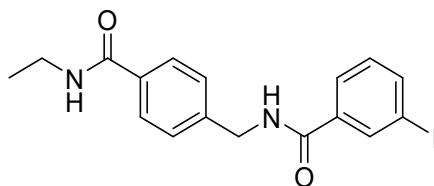

Compound **17b** was synthesised from 3-iodobenzoic acid (2.36 mmol, 0.59 g) and **16** (2.36 mmol, 0.42 g) by general procedure A. The product was a white solid (0.963 g, 76 %).  $^1\text{H}$  NMR (500 MHz, Methanol- $d_4$ )  $\delta$  8.22 (t,  $J$  = 1.7 Hz, 1H), 7.91 (dt,  $J$  = 7.9, 1.4 Hz, 1H), 7.86 (dt,  $J$  = 7.9, 1.4 Hz, 1H), 7.82 – 7.76 (m, 2H), 7.46 – 7.40 (m, 2H), 7.26 (t,  $J$  = 7.9 Hz, 1H), 4.61 (s, 2H), 3.40 (q,  $J$  = 7.2 Hz, 2H), 1.22 (t,  $J$  = 7.3 Hz, 3H).  $^{13}\text{C}$  NMR (126 MHz, Methanol- $d_4$ )  $\delta$  169.80, 143.82, 141.77, 137.46, 134.69, 131.47, 128.52, 128.51, 127.62, 124.46, 94.78, 49.63, 49.51, 49.34, 49.17, 49.00, 48.83, 48.66, 48.49, 44.22, 35.83, 14.91. Calculated for  $\text{C}_{17}\text{H}_{18}\text{I N}_2\text{O}_2$   $[\text{MH}]^+$  409.0, LCMS  $[\text{MH}]^+$  409.1.

F.V. 4-((2-(4-(3,5-dimethylisoxazol-4-yl)-1H-pyrazol-1-yl)acetamido)methyl)-N-ethylbenzamide **18a**

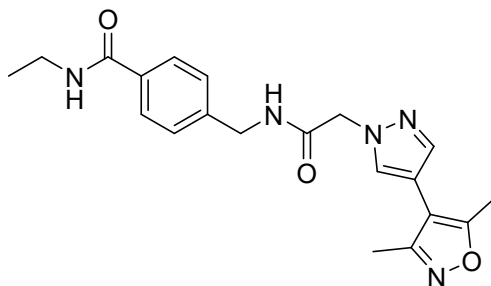

Synthesised from **17a** (1.73 mmol, 0.63 g) via general procedure B. Product was a white solid (0.40 g, 61%). <sup>1</sup>H NMR (500 MHz, DMSO-*d*<sub>6</sub>) δ 8.71 (t, *J* = 6.0 Hz, 1H), 8.45 (t, *J* = 5.5 Hz, 1H), 8.00 (d, *J* = 0.8 Hz, 1H), 7.83 – 7.77 (m, 2H), 7.69 (d, *J* = 0.8 Hz, 1H), 7.37 – 7.31 (m, 2H), 4.92 (s, 2H), 4.36 (d, *J* = 5.9 Hz, 2H), 3.27 (qd, *J* = 7.2, 5.5 Hz, 2H), 2.43 (s, 3H), 2.27 (s, 3H), 1.11 (t, *J* = 7.2 Hz, 3H). <sup>13</sup>C NMR (126 MHz, DMSO-*d*<sub>6</sub>) δ 166.69, 165.63, 163.95, 158.15, 142.05, 137.74, 133.33, 129.79, 127.18, 126.99, 109.68, 107.81, 54.12, 41.97, 40.02, 39.85, 39.69, 39.52, 39.35, 39.19, 39.02, 34.02, 14.86, 11.60, 10.85. Calculated for C<sub>20</sub>H<sub>23</sub>N<sub>5</sub>O<sub>3</sub> [MH]<sup>+</sup> 382.1874, LCMS [MH]<sup>+</sup> found 382.3, HRMS [MH]<sup>+</sup> found 382.1865.

F.VI. 3-(3,5-dimethylisoxazol-4-yl)-N-(4-(ethylcarbamoyl)benzyl)benzamide **18b**

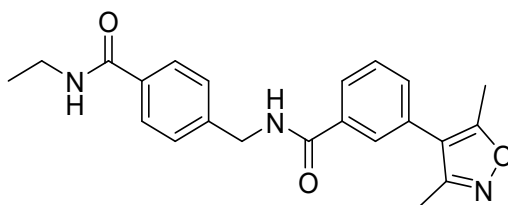

Synthesised from **17b** (1.79 mmol, 0.73 g) via general procedure B. Product was a white solid (0.23 g, 34%). <sup>1</sup>H NMR (500 MHz, DMSO-*d*<sub>6</sub>) δ 9.17 (t, *J* = 6.0 Hz, 1H), 8.42 (t, *J* = 5.6 Hz, 1H), 7.92 (dt, *J* = 7.4, 1.7 Hz, 1H), 7.87 (d, *J* = 1.8 Hz, 1H), 7.82 – 7.77 (m, 2H), 7.63 – 7.53 (m, 2H), 7.39 (d, *J* = 8.2 Hz, 2H), 4.54 (d, *J* = 5.9 Hz, 2H), 3.27 (qd, *J* = 7.2, 5.5 Hz, 2H), 2.42 (s, 3H), 2.24 (s, 3H), 1.11 (t, *J* = 7.2 Hz, 3H). <sup>13</sup>C NMR (126 MHz, DMSO-*d*<sub>6</sub>) δ 165.79, 165.67, 165.42, 158.10, 142.62, 134.75, 133.23, 131.79, 130.07, 129.02, 127.44, 127.15, 126.90, 126.50, 115.50, 42.44, 40.02, 39.85, 39.69, 39.52, 39.35, 39.19, 39.02, 33.97, 14.82, 11.32, 10.41. Calculated for C<sub>22</sub>H<sub>24</sub>N<sub>3</sub>O<sub>3</sub> [MH]<sup>+</sup> 378.1813, LCMS [MH]<sup>+</sup> found 378.3, HRMS [MH]<sup>+</sup> found 378.1802.

F.VII. ethyl (2-(4-bromo-1H-pyrazol-1-yl)acetyl)-L-alaninate **20a**

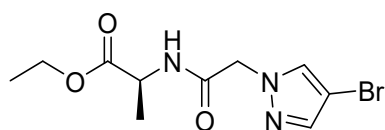

Synthesised from 2-(4-bromo-1H-pyrazol-1-yl)acetic acid (2.15 mmol, 0.44 g and ethylalaninate hydrochloride (1.95 mmol, 0.30 g) general procedure B. White solid (0.414 g, 72%). <sup>1</sup>H NMR (500 MHz, Methanol-*d*<sub>4</sub>) δ 7.78 (d, *J* = 0.7 Hz, 1H), 7.51 (d, *J* = 0.7 Hz, 1H), 4.90 (s, 7H), 4.40 (q, *J* = 7.3 Hz, 1H), 4.17 (qd, *J* = 7.1, 0.6 Hz, 2H), 1.40 (d, *J* = 7.3 Hz, 3H), 1.26 (t, *J* = 7.1 Hz, 3H). <sup>13</sup>C NMR (126 MHz, Methanol-*d*<sub>4</sub>) δ 173.84, 168.68, 141.40, 133.18, 94.38, 62.46, 55.19, 49.74, 49.51, 49.34, 49.17, 49.00, 48.83, 48.66, 48.49, 17.44, 14.42. Calculated for C<sub>10</sub>H<sub>15</sub><sup>79</sup>BrN<sub>3</sub>O<sub>3</sub> [MH]<sup>+</sup> 304.0, LCMS [MH]<sup>+</sup> 304.0

F.VIII. Ethyl (3-iodobenzoyl)alaninate **20b**

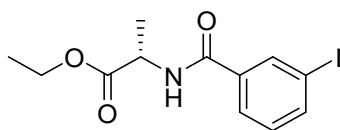

Synthesised from 3-iodobenzoic acid (6.55 mmol, 1.62 g) and ethyl alaninoate hydrochloride (6.55 mmol, 1.0 g) via general procedure A. Product was an oily solid (1.52 g, 71%). <sup>1</sup>H NMR (500 MHz, Methanol-d<sub>4</sub>) δ 8.21 (t, *J* = 1.7 Hz, 1H), 7.86 (dddd, *J* = 23.1, 7.8, 1.8, 1.1 Hz, 2H), 7.24 (t, *J* = 7.9 Hz, 1H), 4.56 (q, *J* = 7.3 Hz, 1H), 4.19 (q, *J* = 7.1 Hz, 2H), 1.49 (d, *J* = 7.4 Hz, 3H), 1.27 (t, *J* = 7.1 Hz, 3H). <sup>13</sup>C NMR (126 MHz, Methanol-d<sub>4</sub>) δ 174.20, 168.34, 141.74, 137.51, 137.11, 131.32, 127.77, 94.67, 62.35, 50.26, 49.51, 49.34, 49.17, 49.00, 48.83, 48.66, 48.49, 17.13, 14.48. Calculated for C<sub>12</sub>H<sub>14</sub>I<sub>1</sub>NO<sub>3</sub> [MH]<sup>+</sup> 348.0, LCMS [MH]<sup>+</sup> 348.1.

F.IX. (S)-2-(2-(4-bromo-1H-pyrazol-1-yl)acetamido)-N-ethylpropanamide **21**

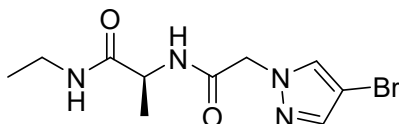

Synthesised from **20a** (1.37 mmol, 0.41 g) general procedure C. White solid (10 mg, 7.2%). <sup>1</sup>H NMR (500 MHz, Methanol-d<sub>4</sub>) δ 7.78 (d, *J* = 0.7 Hz, 1H), 7.52 (d, *J* = 0.8 Hz, 1H), 4.88 (d, *J* = 0.9 Hz, 2H), 4.32 (q, *J* = 7.2 Hz, 1H), 3.20 (q, *J* = 7.3 Hz, 2H), 1.35 (d, *J* = 7.2 Hz, 3H), 1.11 (t, *J* = 7.3 Hz, 3H). <sup>13</sup>C NMR (126 MHz, Methanol-d<sub>4</sub>) δ 174.31, 168.58, 141.48, 133.27, 94.37, 55.32, 50.60, 49.51, 49.34, 49.17, 49.00, 48.83, 48.66, 48.49, 35.31, 18.31, 14.73. Calculated for C<sub>10</sub>H<sub>16</sub><sup>79</sup>BrN<sub>4</sub>O<sub>2</sub> [MH]<sup>+</sup> 303.0, LCMS [MH]<sup>+</sup> 303.1.

F.X. (S)-2-(2-(4-(3,5-dimethylisoxazol-4-yl)-1H-pyrazol-1-yl)acetamido)-N-ethylpropanamide **22**

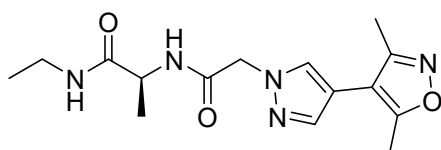

Synthesised from **21** (0.10 mmol, 30 mg) general procedure B. White solid (10 mg, 31%). <sup>1</sup>H NMR (500 MHz, MeOD) δ 7.88 (s, 1H), 7.69 (s, 1H), 4.96 (s, 2H), 4.34 (q, *J* = 7.1 Hz, 1H), 3.20 (q, *J* = 7.3 Hz, 2H), 2.45 (s, 3H), 2.30 (s, 3H), 1.37 (d, *J* = 7.1 Hz, 3H), 1.11 (t, *J* = 7.3 Hz, 3H). <sup>13</sup>C NMR (126 MHz, MeOD) δ 174.30, 168.86, 166.50, 160.14, 139.86, 131.62, 112.11, 109.13, 55.03, 54.81, 50.60, 49.51, 49.34, 49.17, 49.00, 48.83, 48.66, 48.49, 35.30, 18.39, 14.75, 11.63, 10.95. Calculated for C<sub>15</sub>H<sub>22</sub>N<sub>5</sub>O<sub>3</sub> [MH]<sup>+</sup> 320.1718, LCMS [MH]<sup>+</sup> found 320.3, HRMS [MH]<sup>+</sup> found 320.1715 (HPLC purity >98%).

F.XI. ethyl (3-(3,5-dimethylisoxazol-4-yl)benzoyl)alaninate **23**

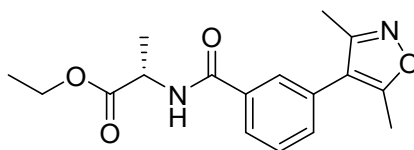

Synthesised from **20b** via general method B giving **23** which was an oily off white solid (0.76 g, 64%). <sup>1</sup>H NMR (500 MHz, MeOD) δ 7.89 (ddd, J = 7.7, 1.8, 1.2 Hz, 1H), 7.82 (td, J = 1.8, 0.6 Hz, 1H), 7.59 (td, J = 7.7, 0.6 Hz, 1H), 7.54 (dt, J = 7.7, 1.4 Hz, 1H), 4.60 (q, J = 7.3 Hz, 1H), 4.21 (q, J = 7.1 Hz, 2H), 2.43 (s, 3H), 2.27 (s, 3H), 1.51 (d, J = 7.3 Hz, 3H), 1.28 (t, J = 7.1 Hz, 3H). <sup>13</sup>C NMR (126 MHz, MeOD) δ 174.38, 169.62, 167.37, 159.97, 135.86, 131.97, 127.79, 117.32, 62.39, 50.33, 17.16, 14.48, 11.40, 10.63. Calculated for C<sub>17</sub>H<sub>21</sub>N<sub>2</sub>O<sub>4</sub> [MH]<sup>+</sup> 317.1, LCMS [MH]<sup>+</sup> 317.2.

F.XII. 3-(3,5-dimethylisoxazol-4-yl)-N-(1-(ethylamino)-1-oxopropan-2-yl)benzamide **24**

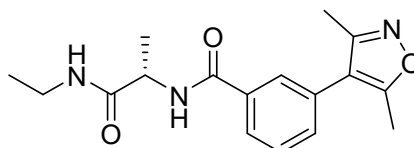

Synthesised from **23** (1.52 mmol, 0.48 g) general procedure C. Product was a white solid (0.43 mg, 90%). <sup>1</sup>H NMR (500 MHz, Methanol-d<sub>4</sub>) δ 7.90 (dt, J = 7.8, 1.5 Hz, 1H), 7.84 (t, J = 1.8 Hz, 1H), 7.58 (t, J = 7.7 Hz, 1H), 7.52 (dt, J = 7.8, 1.5 Hz, 1H), 4.54 (q, J = 7.2 Hz, 1H), 3.24 (q, J = 7.2 Hz, 2H), 2.42 (s, 3H), 2.26 (s, 3H), 1.46 (d, J = 7.2 Hz, 3H), 1.13 (t, J = 7.3 Hz, 3H). <sup>13</sup>C NMR (126 MHz, Methanol-d<sub>4</sub>) δ 174.93, 169.35, 167.32, 159.95, 135.90, 133.55, 131.90, 130.16, 129.38, 127.83, 117.32, 51.21, 49.51, 49.34, 49.17, 49.00, 48.83, 48.66, 48.49, 35.33, 18.25, 14.79, 11.41, 10.64. Calculated for C<sub>17</sub>H<sub>21</sub>N<sub>3</sub>O<sub>3</sub> [MH]<sup>+</sup> 316.1656, LCMS [MH]<sup>+</sup> found 316.3, HRMS [MH]<sup>+</sup> found 316.1653 (HPLC purity >99%).

F.XIII. (S)-N-benzyl-2-(2-(4-bromo-1H-pyrazol-1-yl)acetamido)propanamide **21-SI**

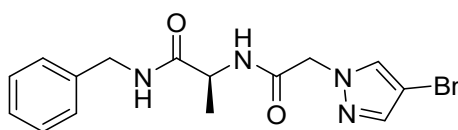

Synthesised from **20a** (0.98 mmol, 300 mg) and benzylamine (1.48 mmol, 158.62 mg) via general procedure C. The product was a white solid (210 mg, 59%). <sup>1</sup>H NMR (500 MHz, MeOD) δ 7.77 (d, J = 0.7 Hz, 1H), 7.47 (d, J = 0.8 Hz, 1H), 7.33 – 7.19 (m, 5H), 4.89 (s, 2H), 4.43 – 4.36 (m, 3H), 1.39 (d, J = 7.1 Hz, 3H). <sup>13</sup>C NMR (126 MHz, MeOD) δ 174.58, 168.67, 141.50, 139.75, 133.24, 129.53, 128.41, 128.19, 94.37, 55.38, 50.73, 49.51, 49.46, 49.34, 49.28, 49.17, 49.00, 48.83, 48.66, 48.49, 44.05, 18.22. Calculated for C<sub>15</sub>H<sub>18</sub><sup>79</sup>Br N<sub>4</sub>O<sub>2</sub> [MH]<sup>+</sup> 365.1, LCMS [MH]<sup>+</sup> 365.3.



F.XIV. (S)-N-benzyl-2-(2-(4-(3,5-dimethylisoxazol-4-yl)-1H-pyrazol-1-yl)acetamido)propenamide **25**

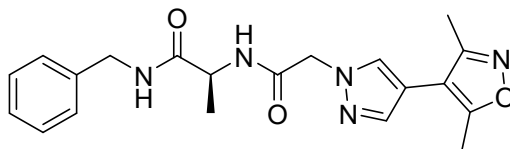

Synthesised from **21-SI** (0.24 mmol, 89 mg) via general procedure B. Product was a white solid (31 mg, 34%). <sup>1</sup>H NMR (500 MHz, MeOD)  $\delta$  7.86 (s, 1H), 7.62 (s, 1H), 7.32 – 7.18 (m, 5H), 4.95 (d,  $J$  = 1.4 Hz, 2H), 4.43 (q,  $J$  = 7.1 Hz, 1H), 4.38 (d,  $J$  = 1.7 Hz, 2H), 2.43 (s, 3H), 2.28 (s, 3H), 1.41 (d,  $J$  = 7.1 Hz, 3H) <sup>13</sup>C NMR (126 MHz, MeOD)  $\delta$  174.58, 168.93, 166.50, 160.14, 139.81 (d,  $J$  = 12.1 Hz), 131.58, 129.51, 128.39, 128.17, 112.12, 109.13, 55.09, 50.73, 44.04, 18.29, 11.63, 10.95. Calculated for C<sub>20</sub>H<sub>24</sub>N<sub>5</sub>O<sub>3</sub> [MH]<sup>+</sup> 382.1879, LCMS [MH]<sup>+</sup> 382.3, HRMS [MH]<sup>+</sup> found 382.1877 (HPLC purity >96%).

## Structural Biology

### Protein purification

All purification steps were performed using AKTA Pure at 4 °C. For BRD4, harvested bacterial cells were resuspended in 50mM HEPES buffer (pH 7.4) containing 200 mM NaCl, 10 mM imidazole, 0.5 mg mL<sup>-1</sup> lysosyme, and 0.2 mg mL<sup>-1</sup> DNase at 4°C for 1h. After sonication and centrifugation (1h at 35,000 x  $g$ ), the supernatant was purified by immobilized Ni<sup>2+</sup> ion affinity chromatography. The peak fractions were pooled and incubated with TEV protease (50:1) at 4°C overnight. The cleaved His-tag was separated by size exclusion chromatography using a Superdex 75 (26/60) column and eluted with 50 mM HEPES buffer (pH 7.4) containing 200 mM NaCl and 0.5 mM TCEP.

### Surface Plasmon Resonance (SPR)

SPR-based ligand binding assays were performed using Biacore S200 (GE Healthcare) at 20 °C using multi-cycle. Immobilisation of BRD4 was achieved using standard amine coupling on a CM5 chip surface. The surface was prepared through activation with EDC/NHS, followed by injection of 30  $\mu$ g/ml BRD4 until target level 6000 RU was reached. The surface was then quenched using 1M Ethanolamine and washed with running buffer 10mM HEPES, 150mM NaCl, 0.01% TWEEN20, and 1% DMSO with a flow rate of 30  $\mu$ g/ml. Compounds were injected in a dose-response manner (3-fold dilution over 11 points ranging from 0-33 $\mu$ M) in series across the control and BRD4 immobilised flow cells using solvent correction to account for bulk refractive index changes. The reference control channel was subtracted from BRD4 immobilised channel and dose-response data was fitted using a steady state 1:1 binding model to determine the K<sub>d</sub>.

| Compound   | K <sub>d</sub> Data (μM)       |                    |
|------------|--------------------------------|--------------------|
|            | Mean ( <sup>‡</sup> n=4, *n=2) | Standard Deviation |
| <b>22</b>  | 0.051 <sup>‡</sup>             | 0.035              |
| <b>18a</b> | 35.049 <sup>‡</sup>            | 1.900              |
| <b>18b</b> | 2.553*                         | 1.240              |
| <b>24</b>  | 14.619*                        | 0.950              |
| <b>25</b>  | 11.203*                        | 1.760              |

## Protein crystallography

Crystallization was performed at 20 °C in the sitting drop vapour diffusion method dispensed using Mosquito (TTP labtech). Crystals of BRD4 were grown in the presence of 1 mM **22** from BRD4 7.5mg/ml, 90mM Nitrate Phosphate Sulfate, 100mM Tris Bicine pH8.5, 30%w/v Ethylene glycol PEG 8000. Crystals were harvested in cryoprotectant using additional reservoir and flash frozen in liquid nitrogen before data collection. X-ray diffraction data were recorded using Bruker D8-Venture MetalJet X-ray, Newcastle University (Newcastle, UK). Data processing was carried out using Proteum3 software (Bruker AXS 2015), POINTLESS/AIMLESS [PMID: 21460446] and other CCP4 programs [PMID: 15299374] run within the CCP4i2 GUI. PHASER [PMID: 19461840] was used for molecular replacement using pdb 5LRQ as a search model. Iterative rounds of model building and refinement was performed using COOT [PMID: 20383002] and REFMAC5 [PMID: 21460454], respectively. Figures were prepared using CCP4MG [PMID: 15572783]. X-ray data collection and refinement statistics

|                            | Compound <b>22</b> : BRD4 complex<br>(pdb 8C11) |
|----------------------------|-------------------------------------------------|
| <b>Data collection</b>     |                                                 |
| Space group                | P2 <sub>1</sub> 2 <sub>1</sub> 2 <sub>1</sub>   |
| Unit cell (Å)              | a=38.1 b=43.2 c=79.3                            |
| Resolution (Å)             | 18.2-1.8                                        |
| (highest resolution shell) | (1.84-1.80)                                     |
| Total observations         | 79924 (2514)                                    |

|                                              |              |
|----------------------------------------------|--------------|
| Unique                                       | 12689 (719)  |
| R <sub>merge</sub>                           | 0.076(0.85)  |
| Mean I/ $\sigma$ (I)                         | 8.3 (1.4)    |
| Multiplicity                                 | 6.3 (3.5)    |
| Completeness %                               | 99.8 (99.5)  |
| CC(1/2)                                      | 0.99 (0.54)  |
| <b>Refinement</b>                            |              |
| Number of atoms (B-factor)                   |              |
| protein                                      | 2,097 (14.2) |
| other                                        | 44 (43.3)    |
| waters                                       | 116 (22.1)   |
| R (highest resolution shell)                 | 0.195        |
| R <sub>free</sub> (highest resolution shell) | 0.234        |
| Rmsd bonds (Å)                               | 0.0080       |
| Rmsd angles (°)                              | 1.550        |

The structures have been deposited in the PDB with accession codes 8C11.

## Western blotting experiments

MM.1S cells were obtained from the American Type Culture Collection (ATCC) and maintained in RPMI-1640 medium containing 2 mM L-glutamine and supplemented with 10% (v/v) fetal bovine serum (FBS, Life Technologies). Cells were kept in culture for fewer than 25 passages. Cultures were tested for mycoplasma contamination every 3 months using the MycoAlert Mycoplasma Detection Kit (Lonza) and returned negative throughout. MM.1S cells  $2 \times 10^6$  were seeded per well of six-well plates (Costar) and treated with compounds at various concentrations for 4 h. Cells were washed with PBS and soluble lysate was prepared in PhosphoSafe buffer (Merck Millipore) containing protease inhibitor

cocktail (Roche). Samples with 15 µg of total protein were loaded in Laemmli sample buffer containing final 2.5% (v/v) β-mercaptoethanol into 4-20% polyacrylamide Tris-glycine (TGX) gels (Bio-Rad) and transferred onto 0.45 µM Hybond nitrocellulose membrane (GE Healthcare). Primary c-Myc antibody (CST 5605) at 1:1000 dilution in 5% (w/v) BSA in Tris-buffered saline (TBS) containing 0.05% (v/v) Tween20 (TBST) (overnight incubation at 4°C), GAPDH antibody (Santa Cruz sc-47724) at 1:3000 dilution (1 h room temperature incubation), and secondary anti-rabbit or anti-mouse HRP-conjugated antibodies (Dako; P0448 or P0447, respectively) at 1:3000 dilution in 5% (w/v) non-fat milk in TBST (1 h room temperature incubation). The immunoreactive bands were detected with Clarity ECL (Bio-Rad) and visualized using a Fujifilm LAS3000.

**Gel running buffer:**

1X Tris-glycine running buffer (200 mM glycine, 3.5 mM sodium dodecyl sulphate, 25 mM Tris base

Transfer buffer from gel to membrane:

Tris-glycine transfer buffer (Life Technologies) containing 4% (v/v) methanol

## ADME Screening

ADME assays were carried out as described previously: logD [PMID: 24168238], solubility [PMID: 26855285], metabolic stability [PMID: 29940120], MDCK permeability [PMID: 30222362].
